1 Kateřina Hlaváčková ORCID iD: 0000-0002-7218-8829  
2 Olga Šamajová ORCID iD: 0000-0001-6121-7164  
3 Miroslava Hrbáčková ORCID iD: 0000-0001-5039-6689  
4 Jozef Šamaj ORCID iD: 0000-0003-4750-2123  
5 Miroslav Ovečka ORCID iD: 0000-0002-1570-2174

6 Article Type: Original Article

7 **Genetic manipulation of stress-induced mitogen-activated protein kinase modulates**  
8 **early stages of the nodulation process in *Medicago sativa***

9 **Kateřina Hlaváčková<sup>1</sup>, Olga Šamajová<sup>1</sup>, Miroslava Hrbáčková<sup>1</sup>, Jozef Šamaj<sup>1</sup>, Miroslav**  
10 **Ovečka<sup>1\*</sup>**

11 <sup>1</sup>Department of Biotechnology, Faculty of Science, Palacký University Olomouc, Olomouc,  
12 Czech Republic

13 **\*Correspondence:**

14 Miroslav Ovečka

15 email: [miroslav.ovecka@upol.cz](mailto:miroslav.ovecka@upol.cz)

16 **Running title:** SIMK modulates nodulation in alfalfa

17 **One sentence summary:** Genetic manipulation of SIMK in alfalfa revealed that SIMK  
18 modulates root hair capacity to form infection pockets and infection threads during the early  
19 interactions between alfalfa and rhizobia.

20

21 Total word count: 7191

22 Number of Figures: 9

23 Of which color: 9

24

25 **Keywords:** alfalfa, infection pocket, infection thread, MAPKs, nodulation, root hairs, SIMK,  
26 *Sinorhizobium meliloti*, subcellular localization

## 27 **Abstract**

28 Leguminous plants have established a mutualistic endosymbiotic interaction with nitrogen-  
29 fixing rhizobia to secure nitrogen sources in new specialized organs called root nodules.  
30 Before nodule formation, the development of early symbiotic structures is essential for  
31 rhizobia docking, internalization, targeted delivery, and intracellular accommodation. We  
32 have recently reported that overexpression of stress-induced mitogen-activated protein kinase  
33 (SIMK) in alfalfa affects root hair, nodule and shoot formation. However, detailed subcellular  
34 spatial distribution, activation, and developmental relocation of SIMK during the early stages  
35 of alfalfa nodulation remain unclear. Here, we qualitatively and quantitatively characterized  
36 SIMK distribution patterns in rhizobium-infected root hairs using live-cell imaging and  
37 immunolocalization, employing alfalfa stable transgenic lines with genetically manipulated  
38 SIMK abundance and kinase activity. In the *SIMKK-RNAi* line, showing downregulation of  
39 *SIMKK* and *SIMK*, we found a considerably decreased accumulation of phosphorylated SIMK  
40 around infection pockets and infection threads, which was strongly increased in the GFP-  
41 SIMK line, constitutively overexpressing GFP-tagged SIMK. Thus, genetically manipulated  
42 SIMK modulates root hair capacity to form infection pockets and infection threads. These  
43 results shed new light on SIMK spatio-temporal participation in the early interactions between  
44 alfalfa and rhizobia, and its internalization into root hairs, showing that local accumulation of  
45 active SIMK indeed modulates nodulation in alfalfa.

## 46 **Introduction**

47 Nitrogen shortage in the soil is one of the major factors restricting the growth and productivity  
48 of plants, including crops. To overcome or alleviate this limitation, *Medicago sativa* L.  
49 (alfalfa), a legume crop of high agronomic and ecological importance, is able to acquire  
50 nitrogen by symbiotic hosting of nitrogen-fixing rhizobia in *de novo* formed specialized  
51 organs, root nodules (Checcucci *et al.*, 2016; Wang *et al.*, 2018). Root nodules provide  
52 rhizobia with favorable conditions to convert atmospheric dinitrogen (N<sub>2</sub>) into ammonia  
53 (NH<sub>3</sub>) in the process of biological nitrogen fixation. Rhizobia export N-rich compounds to the  
54 host plant in exchange for carbohydrates that are utilized by rhizobia as a source of carbon  
55 and energy (White *et al.*, 2007; Oldroyd *et al.*, 2011). The legume-rhizobium symbiosis is  
56 established through a complex developmental process that starts with the exchange of  
57 signaling molecules between the host and symbiont, and the activation of signal transduction  
58 pathways, triggering the nodulation program in the host legume plant (Oldroyd, 2013; Yang *et*

59 *al.*, 2022). Flavonoids secreted by legume roots regulate the transcriptional activity of  
60 nodulation (*nod*) genes that stimulate rhizobia to produce nodulation factors (NFs),  
61 lipochitooligosaccharides, with the backbone of N-acetylglucosamine units, and fatty acids at  
62 the non-reducing end. NFs are essential for host-specificity, rhizobial infection, and nodule  
63 organogenesis (Dénarié and Cullimore, 1993; Clúa *et al.*, 2018; Kidaj *et al.*, 2020). Perception  
64 of the correct NF structure by compatible receptors in legume root cells initiates early steps of  
65 nodulation. These early nodulation events include intracellular calcium oscillations,  
66 deformations of root hairs as well as alternations to the root hair cytoskeleton, preparing the  
67 host legume plant for symbiotic infection by invading rhizobia (Gage, 2004; Timmers, 2008;  
68 Roy *et al.*, 2020). Simultaneously, cell divisions in the root cortex and pericycle are  
69 reinitiated, leading to the establishment of root nodule primordium with active meristem  
70 (Jones *et al.*, 2007).

71 Nodule formation requires two separate, but spatially and temporally highly  
72 coordinated processes, namely rhizobial infection of root hairs and nodule organogenesis in  
73 the root cortex (Oldroyd and Downie, 2008; Ibáñez *et al.*, 2017). Before nodules arise as  
74 newly formed functional and nitrogen-fixing root lateral organs, rhizobia must travel from the  
75 root surface toward the target cells in the inner root tissue. In the initial stage, rhizobia attach  
76 to the growing root hair tips and are trapped in the root hair curls creating enclosed chambers,  
77 known as infection pockets (Fournier *et al.*, 2015; Rae *et al.*, 2021). Within the infection  
78 pockets, rhizobia divide and form colonies referred to as infection foci from which infection  
79 threads (ITs) entering root hairs are initiated by inverted tip growth. These plant-made tube-  
80 like membrane channels are filled with rhizobia, grow down towards the base of infected root  
81 hair, and branch out by growing through the root cortex. Eventually, the inward-growing IT  
82 and the outward-growing root nodule primordium meet inside the root tissue (Fournier *et al.*,  
83 2008; Rashid *et al.*, 2015). When ITs reach the nodule primordium, rhizobia are released into  
84 the cytoplasm of host cells by endocytosis, become surrounded by plant-derived peribacteroid  
85 membrane, and differentiate into bacteroids that are responsible for nitrogen fixation by the  
86 activity of nitrogenase enzymatic complex (Terpolilli *et al.*, 2012; Poole *et al.*, 2018). Since  
87 only a specific NFs mixture allows a rhizobial strain to nodulate a particular legume host,  
88 mutual compatibility between the two symbionts is essential for establishing a successful  
89 symbiotic partnership (Wang *et al.*, 2018; Walker *et al.*, 2020).

90 Within a complex signaling network controlling the nodulation process, mitogen-  
91 activated protein kinases (MAPKs) become activated early after rhizobial infection (Lopez-

92 Gomez *et al.*, 2012). MAPK cascades represent conserved and universal signaling hubs  
93 transducing external stimuli into target substrates by a sequential action of three protein  
94 kinases, MAPK kinase kinase (MAPKKK), MAPK kinase (MAPKK), and MAPK. Plant  
95 MAPKs can be activated by a variety of biotic and abiotic stress stimuli. During signal  
96 transduction, MAPKKK reversibly activates its downstream MAPKK, which phosphorylates  
97 and activates MAPK by dual phosphorylation of threonine (T) and tyrosine (Y) residues of  
98 the T-X-Y motif (Pitzschke, 2015; Xu and Zhang, 2015; Zhang and Zhang, 2022). Activated  
99 MAPKs phosphorylate and regulate many diverse substrates such as transcription factors,  
100 enzymes, cytoskeletal proteins, or other kinases. Signaling through MAPK modules regulates  
101 a broad range of cellular and developmental processes as well as pathogenic or beneficial  
102 biotic interactions (Rasmussen *et al.*, 2012; Šamajová *et al.*, 2013; Smékalová *et al.*, 2014;  
103 Komis *et al.*, 2018; Sun and Zhang, 2022).

104 Although MAPK-mediated phosphorylation cascades represent an essential  
105 component of plant cell signaling, still relatively little is known about MAPKs in legume  
106 crops. In alfalfa, stress-induced MAPK (SIMK) is activated by biotic and abiotic stimuli such  
107 as fungal elicitors and salt stress, respectively (Munnik *et al.*, 1999; Cardinale *et al.*, 2000,  
108 2002). Activation analyses and yeast two-hybrid screening identified SIMK kinase (SIMKK)  
109 as SIMK specific activator. SIMKK directly activates SIMK in response to salt stress (Kiegerl  
110 *et al.*, 2000; Cardinale *et al.*, 2002) and localization studies at the subcellular level revealed  
111 substantial relocation of both SIMKK and SIMK from nuclei to the cytoplasmic spot-like  
112 compartments upon salt stress (Ovečka *et al.*, 2014). In addition, activated SIMK relocates  
113 from nuclei to the tips of growing root hairs and together with the dynamic actin cytoskeleton  
114 regulates alfalfa root hair tip growth (Šamaj *et al.*, 2002, 2003). Most importantly, we have  
115 recently addressed SIMK positive role in alfalfa nodulation and development through its  
116 genetic manipulations. For this functional assessment, a transgenic *SIMKK-RNAi* line with a  
117 strong downregulation of SIMK production and activity, and a transgenic GFP-SIMK line  
118 constitutively overexpressing GFP-tagged and activated SIMK were utilized. SIMK  
119 overexpression promoted root hair growth, ITs and nodules clustering, as well as positively  
120 affected agronomical traits such as shoot biomass production, suggesting the biotechnological  
121 potential of this kinase (Hrbáčková *et al.*, 2021). However, the functional and spatiotemporal  
122 mode of SIMK participation at early nodulation stages remains unknown.

123 In this study, live-cell imaging using light-sheet fluorescence microscopy  
124 supplemented with quantitative microscopy employing alfalfa-adapted immunolabeling

125 techniques revealed SIMK-specific subcellular localization and activation at early stages of  
126 alfalfa – *Sinorhizobium meliloti* symbiotic interaction process. SIMK in root hairs targeted the  
127 docking site where *S. meliloti* was attached, entrapped, and internalized. We correlated SIMK  
128 subcellular localization patterns in root hairs at *S. meliloti* internalization sites in two  
129 contrasting alfalfa genotypes, stably overexpressing GFP-tagged SIMK and downregulating  
130 SIMK level by means of *SIMKK* RNAi technology, respectively. SIMK genetic manipulation,  
131 the mode of activation, and the localization pattern indicate that the effectiveness of early  
132 nodulation steps in alfalfa is modulated by precise spatiotemporal SIMK localization and  
133 activation.

## 134 **Results**

### 135 *SIMK* distribution in alfalfa growing root hairs

136  
137 To characterize SIMK localization patterns in growing root hairs of alfalfa control and  
138 transgenic plants, whole-mount immunofluorescence analysis after plant fixation was  
139 performed. Under control conditions, when alfalfa root hairs were not exposed to *S. meliloti*, a  
140 tip-focused pattern of SIMK distribution was observed (Figure 1). Immunodetection revealed  
141 mainly apical and sub-apical localization of SIMK in growing root hairs of alfalfa RSY plants  
142 (Figure 1A) and plants of transgenic *SIMKK*-RNAi (Figure 1D) and GFP-SIMK (Figure 1G)  
143 lines. Moreover, the activated pool of MAPKs in root hairs of RSY (Figure 1B), *SIMKK*-  
144 RNAi (Figure 1E) and GFP-SIMK (Figure 1H) plants were spatially detected, showing the  
145 same distribution (Figure 1, C, F, I). GFP localization in fixed root hairs of transgenic GFP-  
146 SIMK line confirmed the SIMK localization pattern obtained by immunolabeling (Figure 1, G  
147 and J). Profiling of fluorescence intensity distribution along individual root hairs was  
148 documented by semi-quantitative measurements showing higher accumulation of SIMK and  
149 activated MAPKs in the apex and sub-apex of alfalfa root hairs (Figure 1, K-P). In  
150 comparison to RSY root hairs (Figure 1, K and L), the displayed profile distribution revealed  
151 decreased fluorescence intensity of both SIMK and activated MAPKs in root hair tips of  
152 transgenic *SIMKK*-RNAi line (Figure 1, M and N), while the fluorescence intensity of both  
153 SIMK and activated MAPKs was increased in root hair tips of transgenic GFP-SIMK line  
154 overexpressing GFP-tagged SIMK (Figure 1, O and P). These results demonstrate a  
155 considerably decreased presence of activated SIMK in root hair tips of transgenic *SIMKK*-  
156 RNAi line compared to RSY, while it was considerably increased in overexpression GFP-

157 SIMK lines. Since root colonization by *S. meliloti* initiates from growing root hairs, the  
158 presence of activated SIMK in the root hair tip may be an essential component of initial  
159 attachment and invasion steps by rhizobia and could be potentially required for the  
160 establishment and efficient formation of early symbiotic structures.

#### 161 *The reaction of GFP-SIMK to rhizobia infection*

162 To characterize the GFP-SIMK localization pattern during early nodulation stages *in vitro*,  
163 live cell imaging of alfalfa roots stably expressing GFP-tagged SIMK, co-cultivated with  
164 mRFP-labeled *S. meliloti* was performed by LSM 3 to 4 days post inoculation (dpi) (Figure  
165 2A). The mode of interaction was analyzed in the mature part of roots, typically involved in  
166 nodulation, where GFP-SIMK is no more accumulated at the tip of root hairs because of  
167 terminated tip growth (Figure 2, A and B). GFP-SIMK at this stage is located mainly in nuclei  
168 and cytoplasm of root hairs (Hrbáčková *et al.*, 2021). Roots inoculated with *S. meliloti* were  
169 cultivated on the surface of agar plates, leading to the formation of a dense layer-like biofilm  
170 of mRFP-labeled *S. meliloti* associated only with the root and root hairs touching the agar  
171 surface. This model allows studying simultaneously and independently root hairs  
172 symbiotically interacting with rhizobia, but also root hairs untouched by rhizobia that were  
173 exposed to air inside the Petri dish. Both types of root hairs are present on the same root  
174 exposed to the same conditions and treatments (Figure 2A). Therefore, 3D rendering of  
175 symbiotically infected GFP-SIMK root enabled us to distinguish not only non-interacting  
176 alfalfa root hairs from those that interact with rhizobia but also the position of their nuclei  
177 with respect to infection (Supplemental Movie S1). In non-growing root hairs that were not in  
178 physical contact with rhizobia, nuclei were positioned almost uniformly near the root hair  
179 base (Figure 2B; Supplemental Movie S1) while in reactivated root hairs under symbiotic  
180 interaction, nuclei were located closer to the site of rhizobia attachment at the tip (Figure 2C;  
181 Supplemental Movie S1). Preference for detailed LSM live-cell imaging was given to the  
182 curled root hairs with attached rhizobia (Figure 2D) or rhizobia already enclosed in the root  
183 hair curls (Figure 2, E and F), for characterization of SIMK involvement in early infection  
184 structures.

#### 185 *Rhizobia-induced GFP-SIMK subcellular relocation*

186 To find out whether exposure of alfalfa plants to beneficial rhizobia leads to changes in GFP-  
187 SIMK distribution that could be related to the early symbiotic infection, the mean

188 fluorescence intensity of GFP-SIMK was quantitatively evaluated in non-interacting (Figure  
189 3A) and rhizobia-interacting (Figure 3B) root hairs. Under control conditions, GFP-SIMK  
190 was present in nuclei and root hair tips of non-interacting root hairs. Nevertheless, a higher  
191 amount of GFP-SIMK was detected in nuclei (Figure 3C). During early nodulation stages,  
192 GFP-SIMK was localized in nuclei, but substantial accumulation occurred also around  
193 rhizobia at specific infection sites (Figure 3B). Upon this early rhizobial infection, the amount  
194 of GFP-SIMK in nuclei decreased compared to control conditions (Figure 3 D and E). It  
195 seems that GFP-SIMK rather redistributes in root hairs upon rhizobia interaction and  
196 accumulates at infection sites where the nodulation process begins (Figure 3, B and D). This  
197 finding further suggests the supportive role of SIMK during the early stages of alfalfa  
198 nodulation.

#### 199 *Association of GFP-SIMK with rhizobia infection sites*

200 Detailed live cell imaging of symbiotically-interacting root hairs revealed localization of  
201 GFP-SIMK and its association with the position of fluorescently labeled *S. meliloti* at  
202 individual early infection stages, beginning from rhizobia attachment (Figure 4A), rhizobia  
203 entry into the root hairs (Figure 4, B and C), infection pocket formation (Figure 4D) up to  
204 rhizobia complete enclosure inside infection pockets (Figure 4E). The first morphological  
205 response to attached rhizobia was root hair curling (Figure 4F). Semi-quantitative evaluation  
206 of GFP-SIMK fluorescence intensity distribution showed increased accumulation of GFP-  
207 SIMK in the apex of curled root hair, but also at a specific site of rhizobia attachment (Figure  
208 4, F and G). Moreover, orthogonal projections revealed a very close association of GFP-  
209 SIMK with rhizobia attached to the root hair at this specific infection site in the X-Z view  
210 (Figure 4H; Supplemental Movie S2 at 0:00:14s–0:00:21s) and the Y-Z view (Figure 4I;  
211 Supplemental Movie S3 at 0:00:14s–0:00:21s). Later upon infection, a cluster of rhizobia was  
212 located specifically at the neck of root hair curl where rhizobia will enter the root hair (Figure  
213 4J). Profile measurements revealed an accumulation of GFP-SIMK in the nucleus located  
214 close to the infection site, its relocation from the apex, and specific accumulation at the  
215 infection site (Figure 4, J and K). Orthogonal projections from the X-Z view (Figure 4L;  
216 Supplemental Movie S4 at 0:00:14s–0:00:18s) and the Y-Z view (Figure 4M; Supplemental  
217 Movie S5 at 0:00:16s–0:00:24s) revealed close association of GFP-SIMK with rhizobia  
218 gathered at the root hair curl through which rhizobia internalization typically takes place.  
219 Before rhizobia entry into the alfalfa root hairs, a stage of very tight contact between the

220 curled root hair tip and entrapped rhizobia was captured by LSM (Figure 4N). Profile  
221 measurements showed increased fluorescence intensity of GFP-SIMK at the site where  
222 rhizobia are in very close contact with the root hair (Figure 4, N and O). Observation of very  
223 tight association including the partial overlay was confirmed from orthogonal projections in  
224 the X-Z view (Figure 4P; Supplemental Movie S6 at 0:00:14s–0:00:21s) and the Y-Z view  
225 (Figure 4Q, Supplemental Movie S7 at 0:00:15s–0:00:24s). Once were individual rhizobia  
226 entrapped inside root hair curl, an infection pocket formation was initiated (Figure 4R). GFP-  
227 SIMK was found to be accumulated around rhizobia surrounding them inside root hair curls  
228 (Figure 4S) and associated with them as shown from orthogonal projections in the X-Z view  
229 (Figure 4T; Supplemental Movie S8 at 0:00:13s–0:00:25s) and the Y-Z view (Figure 4U;  
230 Supplemental Movie S9 at 0:00:14s–0:00:22s). Later, rhizobia divide and form colonies  
231 within infection pockets (Figure 4V) from which ITs are subsequently initiated. GFP-SIMK  
232 was strongly accumulated around infection pockets containing rhizobia (Figure 4W) and  
233 orthogonal projections in the X-Z view (Figure 4X; Supplemental Movie S10 at  
234 0:00:15s–0:00:22s) and the Y-Z view (Figure 4Y; Supplemental Movie S11 at  
235 0:00:14s–0:00:21s) corroborated close GFP-SIMK distribution around infection pockets.  
236 Importantly, *in vivo* time-lapse imaging showed that accumulation of GFP-SIMK at the  
237 infection site in root hairs during rhizobia attachment (Supplemental Movie S12) and around  
238 infection pockets (Supplemental Movie S13) is stable over time, as semi-quantitatively  
239 documented profile measurements of GFP-SIMK fluorescence intensity distribution did not  
240 fluctuate (Supplemental Movie S14 and S15). Altogether, live cell LSM imaging showed  
241 specific localization and accumulation of GFP-SIMK at infection sites during the early  
242 infection stages, which very closely associated with attaching and internalizing rhizobia.  
243 Based on the presence of activated SIMK in the growing tips of alfalfa root hairs (Figure 1), it  
244 seems that accumulation and activation of SIMK might play an important role in the early  
245 stages of alfalfa root hair infection by *S. meliloti*.

#### 246 *SIMK subcellular localization during infection pockets formation*

247 To reveal the subcellular localization pattern of SIMK and activated MAPKs in root hairs of  
248 control RSY and transgenic *SIMKK-RNAi* and GFP-SIMK plants 3-7 dpi with *S. meliloti*, and  
249 their association with infection pockets, immunofluorescence localization microscopy was  
250 employed. Fixed root samples were immunolabeled for SIMK and activated MAPKs using  
251 SIMK-specific and phospho-specific antibodies, respectively. The pattern of SIMK and



252 activated MAPK localization was documented in infection pockets, the first symbiotic  
253 structure, formed inside root hairs after rhizobial internalization. DAPI, typically used for  
254 DNA nuclear staining, effectively stained also *S. meliloti*, which enabled a detailed study of  
255 MAPKs association with intracellular compartments enclosing rhizobia during the early  
256 stages of the nodulation process. Upon root hair curling, *S. meliloti* was entrapped in alfalfa  
257 root hair curls and became completely enclosed inside infection pockets (Figure 5A). At this  
258 symbiotic stage, immunostaining revealed SIMK localization close to the plasma membrane  
259 and particularly prominent SIMK-specific accumulation around infection pockets in the  
260 alfalfa RSY line (Figure 5B). Labeling of activated MAPKs showed the same pattern of  
261 localization (Figure 5C), indicating a colocalization with SIMK-specific signal (Figure 5D).  
262 This suggests that MAPKs localized around infection pockets were phosphorylated.  
263 Moreover, a semi-quantitative evaluation of fluorescence intensity distribution confirmed the  
264 close association of both SIMK and activated MAPKs with infection pockets (Figure 5P).

265 In root hairs of the transgenic *SIMKK-RNAi* line, infection pockets filled with DAPI-stained *S.*  
266 *meliloti* (Figure 5E) were surrounded by a very faint signal of both SIMK (Figure 5F) and  
267 activated MAPKs (Figure 5G), showing a similar pattern of localization (Figure 5H). Semi-  
268 quantitative profile measurements revealed an association of SIMK and activated MAPKs  
269 with infection pockets. However, compared to the alfalfa RSY plants (Figure 5P), the  
270 fluorescence intensity of SIMK and activated MAPKs was substantially decreased in the  
271 transgenic *SIMKK-RNAi* line (Figure 5Q).

272 Similarly, inside root hairs of transgenic GFP-SIMK line, when *S. meliloti* became fully  
273 entrapped inside infection pockets (Figure 5I), immunodetection with SIMK-specific antibody  
274 revealed substantial accumulation mainly around infection pockets, but prominent SIMK-  
275 specific signal was also detected at the plasma membrane of curled root hairs (Figure 5J).  
276 Activated MAPKs showed a similar subcellular localization pattern around infection pockets  
277 and at the plasma membrane of curled root hairs (Figure 5K), leading to a high degree of  
278 colocalization with SIMK-specific signal (Figure 5L). SIMK localization pattern obtained by  
279 immunostaining with SIMK-specific antibody was independently confirmed by localization of  
280 GFP-tagged SIMK in curled root hairs of the GFP-SIMK line (Figure 5M). Also, GFP-tagged  
281 SIMK showed a high degree of colocalization with SIMK signal obtained by immunolabeling  
282 with SIMK-specific antibody (Figure 5N), and semi-quantitative evaluation of SIMK and  
283 activated MAPKs fluorescence intensity distribution clearly revealed its close association  
284 with infection pockets (Figure 5, O and R).

285 In addition, quantitative comparative analysis of mean fluorescence intensity around infection  
286 pockets revealed, in comparison to control RSY (Figure 6, A and G), significantly higher  
287 levels of SIMK in GFP-SIMK plants (Figure 6, C and G) and significantly lower in transgenic  
288 *SIMKK-RNAi* line (Figure 6, B and G). Also, a lower level of activated MAPKs was found  
289 around infection pockets inside root hairs of the transgenic *SIMKK-RNAi* line (Figure 6, E and  
290 H), while no significant difference was observed in the transgenic GFP-SIMK line compared  
291 to alfalfa RSY plants (Figure 6, D, F and H).

292 Quantitative determination of the colocalization rate between signals of SIMK and activated  
293 MAPKs, expressed by Pearson's correlation coefficient, revealed the highest value around  
294 infection pockets in the transgenic GFP-SIMK line, and the lowest in transgenic *SIMKK-RNAi*  
295 line (Supplemental Figure S1).

296 This analysis clearly showed SIMK-specific accumulation and activation around infection  
297 pockets containing entrapped *S. meliloti* in alfalfa root hairs. The level of active SIMK  
298 accumulation was strongly associated with the SIMK expression level. It was substantial in  
299 root hairs of the transgenic GFP-SIMK line, while the lowest presence of active SIMK was  
300 detected around infection pockets in the transgenic *SIMKK-RNAi* line causing strong  
301 downregulation of both *SIMKK* and *SIMK* (Hrbáčková *et al.*, 2021). Since infection pockets  
302 represent the site of *S. meliloti* entry and ITs initiation, these results indicate that active SIMK  
303 accumulated at this specific location might be required for efficient ITs formation.

#### 304 *SIMK subcellular localization during ITs formation*

305 Complete enclosure of rhizobia inside infection pockets is followed by an invagination of the  
306 host cell plasma membrane and initiation of tunnel-like ITs. Therefore, the pattern of SIMK  
307 and activated MAPKs subcellular localization was characterized by immunolabeling during  
308 ITs formation and propagation through root hairs. Inside root hairs of the alfalfa RSY line, ITs  
309 were easily detectable owing to DAPI-stained *S. meliloti* (Figure 7A). Immunostaining  
310 revealed SIMK-specific signals surrounding growing ITs (Figure 7B). Activated MAPKs  
311 immunolabeled with anti-phospho-p44/42 antibody showed the same subcellular distribution  
312 (Figure 7C) leading to a high degree of colocalization with the SIMK signal (Figure 7D). This  
313 colocalization pattern suggests that SIMK located around ITs was phosphorylated. Semi-  
314 quantitative analysis of the fluorescence intensity distribution revealed a close association of  
315 both SIMK and activated MAPKs with the surface of infection threads (Figure 7O).

316 In the transgenic *SIMKK-RNAi* line, ITs filled with *S. meliloti* (Figure 7E) were similarly  
317 decorated by MAPKs, but showed a very weak signal of both SIMK (Figure 7F) and activated  
318 MAPKs (Figure 7G). Nevertheless, the distribution pattern indicated their subcellular  
319 colocalization (Figure 7H). Profiling of SIMK and activated MAPKs fluorescence intensity  
320 distribution revealed their association with ITs, but substantially decreased (Figure 7P).

321 In the case of ITs in the transgenic GFP-SIMK line (Figure 7I), immunostaining with SIMK-  
322 specific antibody revealed a strong accumulation of SIMK not only along ITs, but also at the  
323 plasma membrane of root hairs (Figure 7J). Signal specific for activated MAPKs showed the  
324 same pattern of subcellular localization (Figure 7K) and colocalized with SIMK signal  
325 (Figure 7L). Observation of GFP-tagged SIMK along ITs (Figure 7M) confirmed the  
326 localization pattern obtained by immunolabeling with SIMK-specific antibody and  
327 colocalized with SIMK signal (Figure 7N). Semi-quantitative evaluation of fluorescence  
328 intensity along indicated profiles (Figure 7, L and N) confirmed enhanced and close  
329 association of SIMK and activated MAPKs with ITs and plasma membrane of root hairs  
330 (Figure 7, Q and R).

331 Moreover, the amount of SIMK (Figure 8, A-C) and activated MAPKs (Figure 8, D-F)  
332 determined by quantitative analysis of mean fluorescence intensity around ITs was markedly  
333 lower in plants of transgenic *SIMKK-RNAi* line in comparison to alfalfa RSY and GFP-SIMK  
334 plants (Figure 8, G and H), while the amount of activated MAPKs in transgenic GFP-SIMK  
335 line was similar to RSY plants (Figure 8H).

336 The colocalization rate between SIMK and activated MAPKs was quantitatively determined  
337 by Pearson's correlation coefficient, revealing that the overall colocalization rate between  
338 SIMK and activated MAPKs was significantly higher along ITs in the transgenic GFP-SIMK  
339 line and RSY plants compared to the transgenic *SIMKK-RNAi* plants (Supplemental Figure  
340 S2).

341 Immunolocalization together with semi-quantitative and quantitative colocalization analyses  
342 clearly revealed the presence of SIMK-specific signal along ITs in alfalfa root hairs. Increased  
343 accumulation of active SIMK along ITs was observed in the transgenic GFP-SIMK line,  
344 while the lowest one was detected in the *SIMKK-RNAi* line. All these data indicate that active  
345 SIMK might be involved during ITs formation and its growth toward the place of root nodule  
346 primordia initiation. Therefore, SIMK supportive role in the propagation of rhizobia-filled ITs

347 through plant root hairs and cortex tissues might play an important role in the regulation and  
348 effectiveness of rhizobia delivery to the nodule primordium and subsequent nodule formation.

349 Moreover, we performed a visualization of plasma membranes using a fixable FM4-64FX,  
350 allowing precise observation of SIMK subcellular localization with regard to membranes of  
351 early symbiotic structures. Whole-mount immunofluorescence co-labeling in RSY revealed  
352 the presence of SIMK close to the membranous surface of infection pockets (Figure 9, A and  
353 C) and ITs (Figure 9, B and D). A lower amount of SIMK was found on membranes of  
354 infection pockets (Figure 9, E and G) and ITs (Figure 9, F and H) in the *SIMKK-RNAi* line,  
355 while a substantially increased amount of SIMK was accumulated on the surface of infection  
356 pockets (Figure 9, I and K) and ITs (Figure 9, J and L) in GFP-SIMK line. In quantitative  
357 terms, Pearson's correlation coefficient showed the highest colocalization rate between SIMK  
358 and FM4-64FX-labeled membranes in the GFP-SIMK line, while the degree of colocalization  
359 was considerably decreased in the *SIMKK-RNAi* line (Figure 9M). The data suggest a close  
360 association and interaction of SIMK with membranes of infection pockets and ITs during  
361 early nodulation stages.

#### 362 *Involvement of active SIMK in ITs formation*

363 To correlate the presence of active SIMK at infection pockets and ITs with nodule formation,  
364 the efficiency of root hair infection by *S. meliloti* was examined. The number of ITs per the  
365 whole root system length was determined in alfalfa RSY and transgenic *SIMKK-RNAi* and  
366 GFP-SIMK plants at 10 dpi with *S. meliloti*, when actively growing ITs should already reach  
367 the root cortex. No significant difference was observed in the averaged root system length  
368 among the three respective lines at 10 dpi with *S. meliloti* (Supplemental Figure S3A).  
369 However, the transgenic *SIMKK-RNAi* line, having strongly downregulated both *SIMKK* and  
370 *SIMK* (Hrbáčková *et al.*, 2021), showed the lowest amount of active SIMK around infection  
371 pockets (Figure 6, E and H, Figure 9, E,G,M), formed significantly fewer ITs compared to  
372 RSY and transgenic GFP-SIMK plants, while the transgenic GFP-SIMK line produced a  
373 similar number of ITs as RSY plants (Supplemental Figure S3B).

#### 374 **Discussion**

375 Leguminous plants are immensely important to the ecosystem and sustainable agriculture  
376 worldwide. Part of their success lies in mutualistic partnership with beneficial nitrogen-fixing

377 bacteria that can convert atmospheric dinitrogen into bioavailable ammonium inside  
378 functional root nodules, which helps them to manage nitrogen shortage and facilitate nutrient  
379 uptake (Brundrett, 2002; Bisseling and Geurts, 2020). Alfalfa has become a high-quality  
380 forage crop with high biological and agronomical potential, especially for its widespread  
381 production, ecological adaptability, high nutrition value, and ability to improve nitrogen-  
382 limited soils (Radović *et al.*, 2009). Early steps of nodulation and subsequent nodule  
383 development depend on a molecular dialogue between the host legume and rhizobia,  
384 including the exchange of signals and activation of protein-phosphorylation-mediated signal  
385 transduction cascades (Shaw and Long, 2003; Grimsrud *et al.*, 2010). Specifically in plants,  
386 developmental and cellular processes are regulated by MAPK-mediated phosphorylation  
387 cascades, and the activity of various protein kinases was shown to be also involved in  
388 symbiotic interactions and nodule formation (Grimsrud *et al.*, 2010; Komis *et al.*, 2018; Roy  
389 *et al.*, 2020). Although symbiotic nitrogen fixation is extensively studied in model legume  
390 species, such as *Medicago truncatula* and *Lotus japonicus*, little is known about the regulation  
391 of symbiotic interaction and the possible involvement of MAPK signaling in alfalfa  
392 nodulation. Here, we characterized the subcellular localization and activation pattern of SIMK  
393 involved in the early stages of alfalfa interaction with *Sinorhizobium meliloti* using  
394 genetically engineered transgenic lines.

395 Despite the remarkable progress in the understanding of MAPK regulation in plant  
396 development and immunity, their involvement in various steps of nodule development is still  
397 not known. In *L. japonicus*, a MAPKK SIP2 was identified to interact with a symbiosis  
398 receptor-like kinase (SymRK), having an essential role in early symbiotic signaling (Chen *et al.*,  
399 2012). Yin *et al.* (2019) identified LjMPK6 as the phosphorylation target of SIP2 and  
400 showed that the SymRK-SIP2-LjMPK6 signaling module is required for nodule  
401 organogenesis and formation in *L. japonicus*. In addition, a recent study demonstrated that  
402 LjPP2C, a type 2C protein phosphatase, fine-tunes nodule development in *L. japonicus* via  
403 dephosphorylating LjMPK6 (Yan *et al.*, 2020). In *M. truncatula*, MtMAPKK4 shows a high  
404 sequence identity to MsSIMKK and LjSIP2. Downstream interacting partners of MtMAPKK4  
405 are MtMAPK3 and MtMAPK6, while the MtMAPKK4-MtMAPK3/6 pathway is involved in  
406 nodule formation and also with *M. truncatula* general growth and development (Chen *et al.*,  
407 2017). Another MAPKK from *M. truncatula*, MtMAPKK5, directly activates MtMAPK3 and  
408 MtMAPK6, and the stress signaling-mediated MtMAPKK5-MtMAPK3/6 module negatively  
409 affects root nodulation (Ryu *et al.*, 2017). In alfalfa, SIMKK is a specific upstream activator

410 of SIMK under salt stress (Kiegerl *et al.*, 2000) and both SIMKK and SIMK relocate from the  
411 nucleus to cytoplasm under salt stress (Ovečka *et al.*, 2014). SIMK overexpression leads to  
412 the development of longer root hairs and promoted ITs and nodule clustering (Hrbáčková *et al.*  
413 *et al.*, 2021). In contrast, SIMK downregulation was accompanied by the formation of shorter  
414 root hairs and few ITs and nodules. Moreover, SIMK overexpression promoted shoot biomass  
415 production, and leaf and petiole development. However, a detailed study of SIMK subcellular  
416 localization and activation pattern clarifying the spatial and temporal model of SIMK  
417 involvement in alfalfa early nodulation stages remained unclear.

418 Possible SIMK involvement in alfalfa nodulation can be anticipated from its subcellular  
419 localization and activation during early symbiotic stages. Crucial is the very tight association  
420 of activated SIMK with infection pockets and ITs. We have recently established light-sheet  
421 fluorescence microscopy for the spatiotemporal imaging of plant development at subcellular,  
422 cellular, tissue and organ levels under controlled environmental conditions (Ovečka *et al.*,  
423 2018). It was utilized in alfalfa for the characterization of root development (Vyplelová *et al.*,  
424 2018) and the involvement of actin cytoskeleton in the interaction with *S. meliloti* (Ovečka *et al.*  
425 *et al.*, 2022). Live-cell imaging using LSFM clearly showed relocation of SIMK from root hair  
426 tips to the *S. meliloti* docking site and further close association with sites of rhizobia  
427 internalization. We developed also reliable immunolocalization protocols for whole-mount  
428 immunolabeling of root samples of *M. sativa*, achieving high signal efficiency and superb  
429 sample stability (Tichá *et al.*, 2020). Employing these immunolabeling methods explicitly  
430 adapted for alfalfa plantlets originating from somatic embryos, we show here subcellular  
431 localization patterns of SIMK during the early stages of the nodulation process in alfalfa.  
432 Moreover, immunolocalization of phosphorylated MAPKs enabled us to check out whether  
433 SIMK is activated or not at the subcellular level. Under control conditions, alfalfa RSY plants  
434 and plants of transgenic *SIMKK-RNAi* and GFP-SIMK lines showed a tip-focused pattern of  
435 activated SIMK localization in growing root hairs in agreement with previously published  
436 data on SIMK localization from both live-cell imaging (Hrbáčková *et al.*, 2021) and  
437 immunofluorescence microscopy (Šamaj *et al.*, 2002). However, decreased accumulation of  
438 activated SIMK in growing root hair tips was observed in the transgenic *SIMKK-RNAi* line,  
439 consistent with Bekešová *et al.* (2015) showing overall decreased accumulation of  
440 phosphorylated SIMK in *SIMKK-RNAi* lines. Although rhizobia can use different routes to  
441 invade plant roots, entrance via root hairs is probably the best understood and could be found  
442 in legumes such as alfalfa, soybean, pea, bean and vetch (Sprent and James, 2007; Sprent *et*

443 *al.*, 2008; Ibáñez *et al.*, 2017). Since root hairs make the first contact with symbiotic rhizobia,  
444 active SIMK in root hairs may play an important role in the alfalfa's early interaction with *S.*  
445 *meliloti* during and after rhizobia attachment. Activation of signaling pathways in the  
446 epidermal cells leads to localized inhibition of the tip growth of root hairs and induces its  
447 physical curling around attached rhizobia. It is followed by the formation of infection pockets  
448 and infection threads, structures essential for rhizobia internalization and delivery toward the  
449 target cells in newly forming nodules (Brewin, 2004; Gage 2004). In contrast to the  
450 overexpressor GFP-SIMK line, where activated SIMK was strongly accumulated around  
451 infection pockets and ITs, the transgenic *SIMKK-RNAi* line showed much-decreased  
452 accumulation. Indeed, the number of formed ITs was significantly lower in the transgenic  
453 *SIMKK-RNAi* line, indicating the importance of activated SIMK in infection pockets, which is  
454 further required for proper ITs formation. Therefore, SIMK downregulation negatively affects  
455 nodule formation, while SIMK overexpression enhances infection pockets and ITs formation.

456 Conclusively, we show that active SIMK is associated with *S. meliloti* internalization sites in  
457 root hairs and with ITs delivering *S. meliloti* to internal root tissues. SIMK downregulation  
458 negatively affects infection pockets and ITs formation. The subcellular immunolocalization  
459 pattern supported by the localization pattern of GFP-SIMK in living cells thus clearly  
460 demonstrates that active SIMK might be a key player responsible for fine-tuning of the  
461 nodulation process in alfalfa. SIMK, therefore, represents a potentially new regulatory protein  
462 required for the establishment of efficient symbiotic interaction in alfalfa.

## 463 **Materials and methods**

### 464 *Plant material*

465 Alfalfa wild-type plants of cv. Regen-SY (RSY) carrying either *35S::GFP:SIMK* construct  
466 (GFP-SIMK fusion protein; Hrbáčková *et al.*, 2021) or *SIMKK-RNAi* in pHellsgate12 plasmid  
467 driven under *35S* promoter (obtained from CSIRO Plant Industry, Australia) were obtained by  
468 regeneration *in vitro* through somatic embryogenesis from leaf explants as previously  
469 described (Samac and Austin-Phillips, 2006; Bekešová *et al.*, 2015; Hrbáčková *et al.*, 2021).  
470 Regenerated alfalfa plants RSY, transgenic *SIMKK-RNAi* line (showing strong  
471 downregulation of *SIMKK* and *SIMK* transcripts and SIMK protein), and transgenic GFP-  
472 SIMK line with upregulated *SIMK* transcript and enhanced SIMK activity (Hrbáčková *et al.*,

473 2021) were transferred to nitrogen-free Fåhrens medium (FAH-N<sub>2</sub>; Fåhrens, 1957) for  
474 inoculation with rhizobia.

#### 475 *Plant inoculation with S. meliloti*

476 Regenerated plantlets of transgenic GFP-SIMK line approximately 1.5 cm long and growing  
477 on a FAH-N<sub>2</sub> medium containing 13 g/L of micro agar were inoculated with *S. meliloti* (strain  
478 Sm2011) producing mRFP with OD<sub>600</sub>= 0.5 (2.50e+008 cell/ml) and used for live-cell  
479 imaging 3 to 4 dpi. For quantitative analyses, 18 days old plants of alfalfa RSY and transgenic  
480 *SIMKK-RNAi* and GFP-SIMK lines originating from somatic embryos and growing on the  
481 FAH-N<sub>2</sub> medium were inoculated with *S. meliloti* wild-type (strain Sm2011) with OD<sub>600</sub>= 0.5.  
482 In total, 2 ml of rhizobial suspension was applied to the root system directly on plates,  
483 followed by vertical cultivation of inoculated plants in an environmental chamber at 21°C,  
484 70% humidity, and 16h/8h light/dark cycle with covered root systems.

#### 485 *Sample preparation for live-cell imaging and light-sheet fluorescence microscopy (LSFM)*

486 Plantlets of transgenic GFP-SIMK line were used for live cell imaging to observe *in vivo*  
487 localization and dynamics of GFP-tagged SIMK during the early stages of nodulation.  
488 Samples for LSFM imaging were prepared according to Ovečka *et al.*, 2015. Fluorinated  
489 ethylene propylene (FEP) tube with an inner diameter of 4.2 mm and outer diameter of 4.6  
490 mm was connected to the glass capillary (inner diameter of 2.15 mm and outer diameter of 4.0  
491 mm) using the hot glue gun. Inoculated plantlet was gently inserted into the FEP tube with  
492 tweezers and medium (FAH-N<sub>2</sub> medium pH 6.5) with 1% (w/v) low melting point agarose  
493 (Sigma Aldrich) containing fiducial markers (fluorescent beads of 1 µm in diameter) was  
494 slowly added from the bottom into the FEP tube. Under these conditions, the plant root was  
495 embedded in the solidified block of the culture medium inside the FEP tube while the green  
496 upper part of the plant was exposed to air. The glass capillary connected to the FEP tube  
497 containing the embedded sample was fixed into the metal holder and directly placed into a  
498 pre-tempered (22°C) LSFM observation chamber filled with a liquid FAH-N<sub>2</sub> medium. After  
499 sample stabilization, imaging was performed using the light-sheet Z.1 fluorescence  
500 microscope (Carl Zeiss, Germany) equipped with Plan-Apochromat 10×/0.5 NA detection  
501 objective and two LSFM 10×/0.2 NA illumination objectives (Carl Zeiss, Germany).  
502 Rhizobia-infected roots were imaged using dual-side light-sheet illumination with excitation



503 laser lines 488 nm for GFP (beam splitter LP 560 and emission filter BP 505-545) and 561  
504 nm for RFP (beam splitter LP 560 and emission filter BP 575-615). Images were acquired  
505 with the PCO.Edge sCMOS cameras (PCO AG, Germany) with an exposure time of 50 ms  
506 and an imaging frequency of every 2 min in Z-stack mode for 80 and 120 min. The scaling of  
507 acquired images in x, y, and z dimensions was  $0.466 \mu\text{m} \times 0.466 \mu\text{m} \times 1.497 \mu\text{m}$ , and light-  
508 sheet thickness was set to the optimal value.

#### 509 *Fixation of alfalfa root samples*

510 For whole-mount immunofluorescence labeling, approximately 1.5 cm long root segments  
511 were excised from roots of alfalfa RSY, *SIMKK-RNAi* and GFP-SIMK plants co-cultivated  
512 with *S. meliloti* and fixed in freshly prepared fixative solution (Tichá *et al.*, 2020). Sampling  
513 was done at 3-7 dpi with *S. meliloti* when infection pockets and growing ITs were clearly  
514 detectable inside rhizobia-infected root hairs after microscopic observation.

#### 515 *Immunolabeling of SIMK and activated MAPKs in symbiotically-infected root hairs*

516 SIMK subcellular localization at early symbiotic stages was performed by  
517 immunofluorescence labeling on fixed root samples of alfalfa RSY, *SIMKK-RNAi* and GFP-  
518 SIMK lines co-cultivated with *S. meliloti* using a SIMK-specific antibody. To check out the  
519 activation state of SIMK in analyzed early stages of nodulation, an activated pool of MAPKs  
520 was immunodetected using a phospho-specific antibody (anti-phospho-p44/42, Cell  
521 Signaling, Netherlands). Root samples were simultaneously double-immunolabeled with  
522 rabbit anti-AtMPK6 (SIMK-specific) primary antibody (Sigma, Life Science, USA) at 1:750  
523 dilution in 2.5% (w/v) BSA in phosphate-buffered saline [PBS; 140 mM NaCl, 2.7 mM KCl,  
524 6.5 mM  $\text{Na}_2\text{HPO}_4 \times 2\text{H}_2\text{O}$ , 1.5 mM  $\text{KH}_2\text{PO}_4$ , pH 7.3] for SIMK localization and with mouse  
525 anti-phospho-p44/42 primary antibody at 1:400 dilution in 2.5% (w/v) BSA in PBS to  
526 visualize activated MAPKs. To improve antibody penetration, vacuum infiltration was used  
527 (3×5 min), followed by overnight incubation at 4°C. Samples were then sequentially  
528 incubated with appropriate Alexa Fluor-conjugated secondary antibodies. First, Alexa Fluor  
529 647 rabbit anti-mouse secondary antibody (Abcam) diluted 1:500 in 2.5% (w/v) BSA in PBS  
530 was used for 2h incubation at 37°C. Samples were extensively washed in PBS (5×10 min),  
531 blocked in 5% (w/v) BSA in PBS for 20 min at RT, and incubated with Alexa Fluor 555 goat  
532 anti-rabbit secondary antibody (Abcam) by keeping the same dilution and incubation

533 conditions. Nuclei and *S. meliloti* were visualized with  $1 \mu\text{g}\cdot\text{ml}^{-1}$  DAPI diluted 1:1000 in PBS  
534 for 15 min at RT in darkness.

#### 535 *FM4-64 staining*

536 The fixable variant of the styryl dye FM4-64 (FX) was used for *in situ* visualizations of  
537 plasma membranes in alfalfa root cells treated with *S. meliloti*. Roots were labeled in liquid  
538 FAH-N<sub>2</sub> medium (pH 6.5) containing FM4-64 (FX) at a final concentration of 4  $\mu\text{M}$  in 5 ml  
539 Eppendorf tubes for 20 min. The whole labeling was performed on ice. The excess dye was  
540 quickly washed out with liquid FAH-N<sub>2</sub> medium, roots were cut into 1.5 cm long segments  
541 and immediately fixed as described previously (Tichá *et al.*, 2020). Fixed root segments were  
542 used for immunolabeling as described above. For SIMK immunostaining in FM4-64 (FX)-  
543 labeled samples, rabbit SIMK-specific primary and Alexa Fluor 647 goat anti-rabbit  
544 secondary antibodies were used.

#### 545 *Confocal laser scanning microscopy (CLSM) and Airyscan CLSM*

546 Root samples immunolabeled for SIMK and activated MAPKs were mounted in the antifade  
547 mounting medium [0.1% (w/v) paraphenylenediamine in 90% (v/v) glycerol buffered with  
548 10% (v/v) PBS at pH 8.2 - 8.6] to protect samples from photo-bleaching and used for  
549 microscopy. Imaging of immunolabeled SIMK and activated MAPKs was performed with  
550 Zeiss LSM 710 platform (Carl Zeiss, Germany) equipped with Plan-Apochromat 40 $\times$ /1.4 Oil  
551 DIC M27 and Plan-Apochromat 63 $\times$ /1.4 Oil DIC M27 objectives. Samples were imaged with  
552 excitation laser lines at 405 nm for DAPI, 488 nm for detection of GFP, 561 nm for Alexa  
553 Fluor 555 to visualize SIMK and 631 nm for Alexa Fluor 647 to detect activated MAPKs.  
554 Microscopic analysis of immunostained SIMK and FM4-64 FX-visualized membranes in  
555 rhizobia-infected root hairs was performed with a Zeiss LSM 880 Airyscan equipped with 32  
556 GaAsP detectors (Carl Zeiss, Germany) using a Plan-Apochromat 63 $\times$ /1.4 Oil DIC M27  
557 objective. Samples were imaged with excitation laser lines at 561 nm for FM4-64FX and 631  
558 nm for Alexa Fluor 647.

#### 559 *Quantification of ITs*

560 For quantitative evaluation of ITs formation, 18 days old plants of RSY, *SIMKK-RNAi* and  
561 GFP-SIMK lines, originating from somatic embryos, were inoculated with *S. meliloti* wild-  
562 type. Inoculated plants were daily subjected to microscopic observations, ITs were counted,

563 and evaluation of ITs number per the whole root system length was performed at 10 dpi with  
564 *S. meliloti* using Axio Zoom.V16 Stereo microscope (Carl Zeiss, Germany).

#### 565 *Image acquisition and processing*

566 The image acquisition, post-processing, semi-quantitative profile measurements, quantitative  
567 colocalization analysis, maximum intensity projections from individual z-stacks, subset  
568 creation of all fluorescence images, and 3D modeling was made using Zeiss ZEN software  
569 (Black and Blue versions, Carl Zeiss, Germany). Data obtained by LSFM imaging were  
570 subjected to 3D rendering. A subset of selected z-stacks was created from the whole root  
571 volume to capture different stages of root nodulation. Data were imported to Arivis Vision4D  
572 2.12.6 software (Arivis AG, Rostock, Germany), automatically converted to a \*.sis file,  
573 displayed as 3D objects, and rendered in the maximum intensity mode. Animations and  
574 videos were prepared by clipping 3D models in XZ and YZ planes and by using rotation and  
575 zooming tools in the 4D clipping panel by arranging keyframes. Although quantification of  
576 fluorescence intensities is not influenced by post-acquisition look-up table (LUT) intensity  
577 adjustments, all images used for semi-quantitative and quantitative analyses were acquired at  
578 the same imaging conditions. The same laser attenuation values for all laser lines were set  
579 prior to the acquisition and the thickness of individual optical sections was optimized  
580 according to Nyquist criteria. The pinhole sizes for green (GFP), red (Alexa Fluor 555) and  
581 yellow (Alexa Fluor 647) channels were matched and the range of detection was appropriately  
582 adjusted to ensure separation of emission wavelengths and to prevent fluorescence spectral  
583 bleed-through. The brightness and contrast of all acquired images were uniformly adjusted  
584 and images exported from ZEN software were assembled into final figure plates using  
585 Microsoft PowerPoint.

#### 586 *Semi-quantitative analysis of the fluorescence intensity distribution*

587 Data obtained from LSFM imaging were semi-quantitatively evaluated by profile  
588 measurements to study the fluorescence intensity distribution of GFP-tagged SIMK in alfalfa  
589 root hairs and its association with *S. meliloti* at early symbiotic stages. GFP-SIMK mean  
590 fluorescence intensity was quantitatively evaluated in specific regions of interest (ROIs)  
591 inside root hairs growing under control conditions or interacting with rhizobia. Distribution of  
592 SIMK, GFP and activated MAPKs around early invasion structures was determined on fixed  
593 and immunolabeled samples inside root hairs of alfalfa control and transgenic plants by semi-

594 quantitative analysis and profile measurement of fluorescence intensities. Intensity profiles  
595 were quantified across infection pockets and ITs as indicated in appropriate images. These  
596 analyses were done using a profile or measure function of Zeiss ZEN 2011 software (Black  
597 version) from single confocal optical sections or maximum intensity projections.

#### 598 *Quantitative colocalization analysis*

599 The mode of fluorescence signals colocalization was analyzed on immunolabeled root  
600 samples of alfalfa control and transgenic plants co-cultivated with *S. meliloti*. Quantitative  
601 colocalization analysis between SIMK and activated MAPKs was conducted in particular  
602 ROIs at early symbiotic stages around infection pockets and ITs. The colocalization range  
603 was measured from single plane confocal sections, and in total, three independent optical  
604 sections per infection pocket and IT were analyzed using the colocalization tool of Zeiss ZEN  
605 2014 software (Blue version). Background thresholds were automatically implemented by the  
606 iterative Costes approach (Costes *et al.*, 2004) and colocalization data were calculated from  
607 manually selected ROIs. Data were displayed in intensity-corrected scatterplot diagrams, the  
608 intensity correlation of colocalizing pixels was expressed by Pearson's correlative coefficient  
609 and results were graphically edited using Microsoft Excel.

#### 610 *Statistical analysis*

611 Statistical parameters of performed experiments, number of samples (N), type of statistical  
612 test and statistical significance represented by asterisks are included in the figure legends. The  
613 statistical significance of differences between treatments was calculated in Microsoft Excel  
614 using a t-test and it is indicated by asterisks (\*  $p < 0.05$ , \*\*  $p < 0.01$ , \*\*\*  $p < 0.001$ , n.s. no  
615 statistical significance).

#### 616 **Supplemental Data**

617 **Supplemental Figure S1.** Quantitative colocalization analysis of MAPKs around infection  
618 pockets in root hairs of control and transgenic plants during an early stage of *M. sativa* – *S.*  
619 *meliloti* symbiotic interaction.

620 **Supplemental Figure S2.** Quantitative colocalization analysis of MAPKs around ITs in root  
621 hairs of control and transgenic plants during *M. sativa* – *S. meliloti* symbiotic interaction.

622 **Supplemental Figure S3.** Effectivity of ITs formation in control and transgenic plants after  
623 inoculation with *S. meliloti*.

624 **Supplemental Movie S1.** 3D volumetric root rendering of GFP-SIMK line symbiotically  
625 interacting with *S. meliloti* expressing mRFP.

626 **Supplemental Movie S2.** Orthogonal projection of the root hair showing GFP-SIMK  
627 association with rhizobia at the docking site from a X-Z view.

628 **Supplemental Movie S3.** Orthogonal projection of the root hair showing GFP-SIMK  
629 association with rhizobia at the docking site from a Y-Z view.

630 **Supplemental Movie S4.** Orthogonal projection of the root hair showing GFP-SIMK  
631 association with a cluster of rhizobia located at the infection site in the neck of root hair curl  
632 from a X-Z view.

633 **Supplemental Movie S5.** Orthogonal projection of the root hair showing GFP-SIMK  
634 association with a cluster of rhizobia located at the infection site in the neck of root hair curl  
635 from a Y-Z view.

636 **Supplemental Movie S6.** Orthogonal projection of the root hair showing a very tight  
637 association of GFP-SIMK with rhizobia at the infection site before rhizobia entry from a X-Z  
638 view.

639 **Supplemental Movie S7.** Orthogonal projection of the root hair showing a very tight  
640 association of GFP-SIMK with rhizobia at the infection site before rhizobia entry from a Y-Z  
641 view.

642 **Supplemental Movie S8.** Orthogonal projection of the root hair showing association of GFP-  
643 SIMK with rhizobia entrapped inside root hair curl at the beginning of infection pocket  
644 formation from a X-Z view.

645 **Supplemental Movie S9.** Orthogonal projection of the root hair showing association of GFP-  
646 SIMK with rhizobia entrapped inside root hair curl at the beginning of infection pocket  
647 formation from a Y-Z view.

648 **Supplemental Movie S10.** Orthogonal projection of the root hair showing association of  
649 GFP-SIMK with rhizobia forming colonies within infection pocket at the beginning of IT  
650 formation from a X-Z view.

651 **Supplemental Movie S11.** Orthogonal projection of the root hair showing association of  
652 GFP-SIMK with rhizobia forming colonies within infection pocket at the beginning of IT  
653 formation from a Y-Z view.

654 **Supplemental Movie S12.** Time-lapse imaging of GFP-SIMK accumulation in the nucleus  
655 and at the infection site in the root hair during rhizobia attachment.

656 **Supplemental Movie S13.** Time-lapse imaging of GFP-SIMK accumulation around infection  
657 pockets in the root hair.

658 **Supplemental Movie S14.** Time-lapse imaging of GFP-SIMK accumulation in the nucleus  
659 and at the infection site in the root hair during rhizobia attachment analyzed by semi-  
660 quantitative GFP-SIMK fluorescence intensity distribution.

661 **Supplemental Movie S15.** Time-lapse imaging of GFP-SIMK accumulation around infection  
662 pockets in the root hair analyzed by semi-quantitative GFP-SIMK fluorescence intensity  
663 distribution.

## 664 **Funding**

665 This work was funded by ERDF project Plants as a tool for sustainable global development  
666 (CZ.02.1.01/0.0/0.0/16\_019/0000827).

## 667 **Acknowledgment**

668 We would like to thank Katarína Takáčová and Monika Vadovičová for their technical help in  
669 all stages of the presented work and Dr. Pavlína Mikulková for her expert technical help with  
670 LSFM imaging.

## 671 **Authors' contributions**

672 KH, OŠ and MH conducted immunolocalization experiments, KH, MO and OŠ conducted  
673 CLSM, ACLSM and LSFM microscopic documentation, KH performed the quantitative  
674 evaluation and statistical analyses. MH prepared and selected transgenic alfalfa lines. JŠ and  
675 MO contributed to the experimental plan and data interpretation. KH and MO wrote the  
676 manuscript with input from all co-authors. JŠ provided infrastructure and secured funding.

## 677 **Conflicts of interest**

678 The authors declare that they have no conflict of interest.

## 679 **Data Availability**

680 Data that support the findings of this study are available from the corresponding author upon  
681 reasonable request.

## 682 **Figure legends**

683 **Figure 1. Subcellular immunolocalization of SIMK and activated MAPKs in growing**  
684 **root hairs of alfalfa control and transgenic plants under control conditions. (A-J)** Whole-  
685 mount immunofluorescence localization of SIMK and activated MAPKs in root hairs of  
686 alfalfa RSY plants (A-C) and plants of transgenic *SIMKK-RNAi* (D-F) and GFP-SIMK (G-J)  
687 lines. SIMK (in magenta) was immunostained with SIMK-specific antibody (A,D,G) and  
688 activated MAPKs (pERK, in yellow) using phospho-specific pERK 44/42 antibody (B,E,H).  
689 Overlay of bright-field images with fluorescence channels (C,F,I), GFP-tagged SIMK (in  
690 green) was localized via GFP fluorescence in fixed root hair of transgenic GFP-SIMK line  
691 (J). (K,M,O) Fluorescence intensity profiles of SIMK, activated MAPKs, and GFP-tagged  
692 SIMK distribution along the measured line shown in (L,N,P). Scale bar = 5  $\mu\text{m}$  (A-J; L,N,P).

693 **Figure 2. Live cell imaging of early nodulation stages in roots of transgenic GFP-SIMK**  
694 **line at 3 dpi with mRFP-labeled *S. meliloti* using LSFM. (A)** 3D rendering overview of  
695 alfalfa root stably expressing GFP-tagged SIMK (green) co-cultivated with mRFP-labeled  
696 rhizobia (magenta). Rhizobia growing on the surface of agar plates are associated with a  
697 portion of the root and root hairs that were in contact with the agar plate surface. (B) Position  
698 of nuclei in root hairs not interacting with rhizobia (arrows). (C) Position of nuclei in root  
699 hairs interacting with rhizobia (arrows). (D-F) Details of root hair infection during rhizobia  
700 attachment and internalization (arrowheads). Scale bar = 20  $\mu\text{m}$  (D-F), 40  $\mu\text{m}$  (B-C).

701 **Figure 3. Quantitative analysis of GFP-SIMK fluorescence intensity distribution in**  
702 **nuclei and tips of alfalfa root hairs under control conditions and upon symbiotic**  
703 **interaction with mRFP-labeled *S. meliloti*. (A-B)** GFP-SIMK distribution in non-interacting  
704 root hairs (A) and root hairs symbiotically interacting with rhizobia (B). Measurement of  
705 GFP-SIMK mean fluorescence intensity was performed in nuclei and root hair tips of non-

706 interacting root hairs (**A**, marked by white dashed boxes) and in nuclei and infection sites of  
707 interacting root hairs (**B**, marked by white dashed boxes). (**C-E**) Quantitative evaluation of  
708 GFP-SIMK signal intensity in non-interacting root hairs (**C**, N=6) and in interacting root hairs  
709 (**D**, N=6), and comparison of GFP-SIMK signal intensity in nuclei of non-interacting and  
710 interacting root hairs (**E**, N=6). Statistical differences were calculated in Microsoft Excel  
711 using t-test. Error bars show  $\pm$  standard deviation (SD). Asterisks indicate statistical  
712 significance between treatments (\* $p < 0,05$ , \*\* $p < 0,01$ , \*\*\* $p < 0.001$ ). Scale bar = 20  $\mu\text{m}$  (**A-**  
713 **B**).

714 **Figure 4. Live cell localization of GFP-SIMK and its association with mRFP-labeled *S.***  
715 ***meliloti* during early nodulation stages in root hairs 3 to 4 dpi using LSM.** (**A-E**)  
716 Selected root hairs at early sequential infection stages showing the distribution of GFP-SIMK  
717 (green) and rhizobia (magenta) during attachment to the root hairs (**A**), followed by rhizobia  
718 internalization (**B, C**), infection pocket formation (**D**), and rhizobia enclosure inside infection  
719 pockets (**E**). (**F-Y**) Detailed qualitative and semi-quantitative analysis of GFP-SIMK (green)  
720 and rhizobia (magenta) distribution during attachment to the root hairs (**F-I**), rhizobia  
721 internalization (**J-Q**), infection pocket formation (**R-U**), and rhizobia enclosure inside  
722 infection pockets (**V-Y**). Semi-quantitative evaluation of GFP-SIMK and mRFP-labeled  
723 rhizobia fluorescence distribution (**G,K,O,S,W**) along dashed arrows in (**F,J,N,R,V**),  
724 indicating GFP-SIMK distribution in symbiotically infected root hairs (grey dashed arrows)  
725 and its association with rhizobia at specific infection sites (yellow dashed arrows).  
726 Representative images prepared from orthogonal projections in X-Z views (**H,L,P,T,X**) and  
727 Y-Z views (**I,M,Q,U,Y**) show a detailed view of GFP-SIMK accumulation around  
728 fluorescently labeled rhizobia (marked with a white dashed boxes). Black arrows in  
729 (**G,K,O,S,W**) show increased accumulation of GFP-SIMK. Green dots in (**C,N**) are fiducial  
730 markers. Scale bar = 10  $\mu\text{m}$  (**F,J,N,R,V**).

731 **Figure 5. Subcellular immunolocalization of SIMK and activated MAPKs around**  
732 **infection pockets in curled root hairs after inoculation with *S. meliloti*.** (**A,E,I**)  
733 Localization of DAPI-stained rhizobia inside infection pocket of RSY (**A**), *SIMKK-RNAi* (**E**),  
734 and GFP-SIMK (**I**) lines. (**B,F,J**) SIMK immunostained with SIMK-specific antibody and  
735 overlaid with DAPI in RSY (**B**), *SIMKK-RNAi* (**F**), and GFP-SIMK (**J**) lines. (**C,G,K**)  
736 Activated MAPKs immunostained with phospho-specific pERK 44/42 antibody and overlaid  
737 with DAPI in RSY (**C**), *SIMKK-RNAi* (**G**), and GFP-SIMK (**K**) lines. (**D,H,L**) Overlay of  
738 DAPI, SIMK and activated MAPKs in RSY (**D**), *SIMKK-RNAi* (**H**), and GFP-SIMK (**L**)  
739 lines. (**M,N**) GFP-tagged SIMK overlaid with DAPI (**M**) and overlay of GFP-tagged SIMK,  
740 SIMK immunostained with SIMK-specific antibody and DAPI in transgenic GFP-SIMK line  
741 (**N**). (**O,P,Q,R**) The fluorescence intensity distribution of SIMK, activated MAPKs, GFP-  
742 tagged SIMK, and DAPI was measured along profiles indicated by white dashed arrows in  
743 (**D,H,L,N**). Black arrows indicate the plasma membrane of the infection pocket, black  
744 arrowheads indicate the root hair plasma membrane. Scale bar = 5  $\mu\text{m}$  (**A-N**).

745 **Figure 6. Quantitative analysis of SIMK and phosphorylated MAPKs fluorescence**  
746 **intensity distribution around infection pockets in curled root hairs after inoculation with**  
747 ***S. meliloti*.** (**A-F**) Immunolocalization of SIMK (**A-C**) and phosphorylated MAPKs (**D-F**) in



748 infection pockets of RSY (**A,D**; N=10 for SIMK, N=7 for pERK), *SIMKK-RNAi* (**B,E**; N=10  
749 for SIMK, N=7 for pERK), and GFP-SIMK (**C,F**; N=9 for SIMK, N=7 for pERK). White  
750 dashed lines in (**A-F**) indicate defined ROIs in which the mean fluorescence intensity was  
751 measured. (**G,H**) Quantitative evaluation of SIMK (**G**) and activated MAPKs (**H**) signal  
752 intensity in transgenic *SIMKK-RNAi* and GFP-SIMK lines compared to RSY plants.  
753 Statistical differences were calculated in Microsoft Excel using t-test. Error bars show  $\pm$   
754 standard deviation (SD). Asterisks indicate statistical significance between treatments (\*\*p <  
755 0,01, \*\*\*p < 0.001, n.s. no statistical significance). Scale bar = 2  $\mu$ m (**A-F**).

756 **Figure 7. Subcellular immunolocalization of SIMK and activated MAPKs around ITs in**  
757 **root hairs induced after inoculation with *S. meliloti*.** (**A,E,I**) Localization of DAPI-stained  
758 rhizobia inside ITs of RSY (**A**), *SIMKK-RNAi* (**E**), and GFP-SIMK (**I**) lines. (**B,F,J**) SIMK  
759 immunostained with SIMK-specific antibody and overlaid with DAPI in RSY (**B**), *SIMKK-*  
760 *RNAi* (**F**), and GFP-SIMK (**J**) lines. (**C,G,K**) Activated MAPKs immunostained with  
761 phospho-specific pERK 44/42 antibody and overlaid with DAPI in RSY (**C**), *SIMKK-RNAi*  
762 (**G**), and GFP-SIMK (**K**) lines. (**D,H,L**) Overlay of DAPI, SIMK and activated MAPKs in  
763 RSY (**D**), *SIMKK-RNAi* (**H**), and GFP-SIMK (**L**) plants. (**M,N**) GFP-tagged SIMK overlaid  
764 with DAPI (**M**) and overlay of GFP-tagged SIMK, SIMK immunostained with SIMK-specific  
765 antibody and DAPI in transgenic GFP-SIMK line (**N**). (**O,P,Q,R**) The fluorescence intensity  
766 distribution of SIMK, activated MAPKs, GFP-tagged SIMK, and DAPI was measured along  
767 profiles indicated by white dashed arrows in (**D,H,L,N**). Black arrows indicate the plasma  
768 membrane of IT, black arrowheads indicate the plasma membrane of root hair. Scale bar = 5  
769  $\mu$ m (**A-N**).

770 **Figure 8. Quantitative analysis of SIMK and phosphorylated MAPKs fluorescence**  
771 **intensity distribution around ITs in root hairs after inoculation with *S. meliloti*.** (**A-F**)  
772 Immunolocalization of SIMK (**A-C**) and phosphorylated MAPKs (**D-F**) in ITs of RSY (**A,D**;  
773 N=8 for SIMK, N=8 for pERK), *SIMKK-RNAi* (**B,E**; N=6 for SIMK, N=7 for pERK), and  
774 GFP-SIMK (**C,F**; N=8 for SIMK, N=8 for pERK). White dashed lines in (**A-F**) indicate  
775 defined ROIs in which the mean fluorescence intensity was measured. (**G,H**) Quantitative  
776 evaluation of SIMK (**G**) and activated MAPKs (**H**) signal intensity in transgenic *SIMKK-*  
777 *RNAi* and GFP-SIMK lines compared to RSY plants. Statistical differences were calculated in  
778 Microsoft Excel using t-test. Error bars show  $\pm$  standard deviation (SD). Asterisks indicate  
779 statistical significance between treatments (\*p < 0,05, \*\*\*p < 0.001, n.s. no statistical  
780 significance). Scale bar = 5  $\mu$ m (**A-F**).

781 **Figure 9. Volume 3D rendering of rhizobia-containing early symbiotic structures with**  
782 **immunolabeled SIMK and membranes visualized using FM4-64FX in root hairs after**  
783 **inoculation with *S. meliloti*.** (**A-D**) RSY root hairs. (**E-H**) Root hairs of *SIMKK-RNAi* line.  
784 (**I-L**) Root hairs of GFP-SIMK line. Subcellular localization of SIMK with membranes of  
785 infection pockets (**A,C,E,G,I,K**) and ITs (**B,D,F,H,J,L**). Overlay of membranes (in magenta),  
786 SIMK (in green) and DAPI-stained rhizobia (in blue). (**M**) Averaged Pearson's correlative  
787 coefficients of colocalization analysis between SIMK and FM4-64FX-stained membranes  
788 around infection pockets and ITs. Details of infection pockets and ITs shown in (**C, D, G, H,**  
789 **K, L**) are marked with a white dashed boxes in (**A,B,E,F,I,J**).

790

791 **References:**

792 **Bekešová S, Komis G, Křenek P, Vypelová P, Ovečka M, Luptovčíak I, Šamaj J** (2015)  
793 Monitoring protein phosphorylation by acrylamide pendant Phos-Tag<sup>TM</sup> in various plants.  
794 *Front Plant Sci* **6**: 336

795 **Bisseling T, Geurts R** (2020) Specificity in legume nodule symbiosis. *Science* **369**: 620–621

796 **Brewin NJ** (2004) Plant cell wall remodeling in the rhizobium-legume symbiosis. *Crit Rev*  
797 *Plant Sci* **23**: 293–316

798 **Brundrett MC** (2002) Coevolution of roots and mycorrhizas of land plants. *New Phytol* **154**:  
799 275–304

800 **Cardinale F, Jonak C, Ligterink W, Niehaus K, Boller T, Hirt H** (2000) Differential  
801 activation of four specific MAPK pathways by distinct elicitors. *J Biol Chem* **275**: 36734–  
802 36740

803 **Cardinale F, Meskiene I, Ouaked F, Hirt H** (2002) Convergence and divergence of stress-  
804 induced mitogen-activated protein kinase signaling pathways at the level of two distinct  
805 mitogen-activated protein kinase kinases. *Plant Cell* **14**: 703–711

806 **Checucci A, Azzarello E, Bazzicalupo M, Galardini M, Lagomarsino A, Mancuso S,**  
807 **Marti L, Marzano MC, Mocali S, Squartini A, Zanardo M, Mengoni A** (2016) Mixed  
808 Nodule Infection in *Sinorhizobium meliloti-Medicago sativa* Symbiosis Suggest the Presence  
809 of Cheating Behavior. *Front Plant Sci* **7**: 835

810 **Chen T, Zhou B, Duan L, Zhu H, Zhang Z** (2017) MtMAPKK4 is an essential gene for  
811 growth and reproduction of *Medicago truncatula*. *Physiol Plant* **159**: 492–503

812 **Chen T, Zhu H, Ke D, Cai K, Wang C, Gou H, Hong Z, Zhang Z** (2012) A MAP kinase  
813 kinase interacts with SymRK and regulates nodule organogenesis in *Lotus japonicus*. *Plant*  
814 *Cell* **24**: 823–838

815 **Clúa J, Roda C, Zanetti ME, Blanco FA** (2018) Compatibility between Legumes and  
816 Rhizobia for the Establishment of a Successful Nitrogen-Fixing Symbiosis. *Genes (Basel)* **9**:  
817 125

818 **Costes SV, Daelemans D, Cho EH, Dobbin Z, Pavlakis G, Lockett S** (2004) Automatic  
819 and quantitative measurement of protein-protein colocalization in live cells. *Biophys J* **86**:  
820 3993–4003

821 **Dénarié J, Cullimore J** (1993) Lipo-oligosaccharide nodulation factors: A new class of  
822 signaling molecules mediating recognition and morphogenesis. *Cell* **74**: 951–954

823 **Fåhrens G** (1957) The infection of clover root hairs by nodule bacteria studied by a simple  
824 glass slide technique. *J Gen Microbiol* **16**: 374–381

- 825 **Fournier J, Teillet A, Chabaud M, Ivanov S, Genre A, Limpens E, de Carvalho-Niebel**  
826 **F, Barker DG** (2015) Remodelling of the infection chamber before infection thread  
827 formation reveals a two-step mechanism for rhizobial entry into the host legume root hair.  
828 *Plant Physiol* **167**: 1233–1242
- 829 **Fournier J, Timmers AC, Sieberer BJ, Jauneau A, Chabaud M, Barker DG** (2008)  
830 Mechanism of infection thread elongation in root hairs of *Medicago truncatula* and dynamic  
831 interplay with associated rhizobial colonization. *Plant Physiol* **148**: 1985–1995
- 832 **Gage DJ** (2004) Infection and Invasion of Roots by Symbiotic, Nitrogen-Fixing Rhizobia  
833 during Nodulation of Temperate Legumes. *Microbiol Mol Biol Rev* **68**: 280–300
- 834 **Grimsrud PA, den Os D, Wenger CD, Swaney DL, Schwartz D, Sussman MR, Ané JM,**  
835 **Coon JJ** (2010) Large-scale phosphoprotein analysis in *Medicago truncatula* roots provides  
836 insight into *in vivo* kinase activity in legumes. *Plant Physiol* **152**: 19–28
- 837 **Hrbáčková M, Luptovčíak I, Hlaváčková K, Dvořák P, Tichá M, Šamajová O, Novák D,**  
838 **Bednarz H, Niehaus K, Ovečka M, Šamaj J** (2021) Overexpression of alfalfa SIMK  
839 promotes root hair growth, nodule clustering and shoot biomass production. *Plant Biotechnol*  
840 *J* **19**: 767–784
- 841 **Ibáñez F, Wall L, Fabra A** (2017) Starting points in plant-bacteria nitrogen-fixing  
842 symbioses: intercellular invasion of the roots. *J Exp Bot* **68**: 1905–1918
- 843 **Jones KM, Kobayashi H, Davies BW, Taga, ME, Walker, GC** (2007) How rhizobial  
844 symbionts invade plants: the *Sinorhizobium - Medicago* model. *Nat Rev Microbiol* **5**:  
845 619–633
- 846 **Kidaj D, Krysa M, Susniak K, Matys J, Komaniecka I, Sroka-Bartnicka A** (2020)  
847 Biological activity of Nod factors. *Acta Biochim Pol* **67**: 435–440
- 848 **Kiegerl S, Cardinale F, Siligan C, Gross A, Baudouin E, Liwosz A** (2000) SIMKK, a  
849 mitogen-activated protein kinase (MAPK) kinase, is a specific activator of the salt stress-  
850 induced MAPK, SIMK. *Plant Cell* **12**: 2247–2258
- 851 **Komis G, Šamajová O, Ovečka M, Šamaj J** (2018) Cell and Developmental Biology of  
852 Plant Mitogen-Activated Protein Kinases. *Annu Rev Plant Biol* **69**: 237–265
- 853 **Lopez-Gomez M, Sandal N, Stougaard J, Boller T** (2012) Interplay of flg22-induced  
854 defence responses and nodulation in *Lotus japonicus*. *J Exp Bot* **63**: 393–401
- 855 **Munnik T, Ligterink W, Meskiene I, Calderini O, Beyerly J, Musgrave A, Hirt H** (1999)  
856 Distinct osmo-sensing protein kinase pathways are involved in signalling moderate and severe  
857 hyper-osmotic stress. *Plant J* **20**: 381–388
- 858 **Oldroyd GED** (2013) Speak, friend, and enter: signalling systems that promote beneficial  
859 symbiotic associations in plants. *Nat Rev Microbiol* **11**: 252–263
- 860 **Oldroyd GED, Downie JA** (2008) Coordinating nodule morphogenesis with rhizobial  
861 infection in legumes. *Annu Rev Plant Biol* **59**: 519–46

- 862 **Oldroyd GED, Murray JD, Poole PS, Downie JA** (2011) The Rules of Engagement in the  
863 Legume-Rhizobial Symbiosis. *Annu Rev Genet* **45**: 119–144
- 864 **Ovečka M, Takáč T, Komis G, Vadovič P, Bekešová S, Doskočilová A, Smékalová V,**  
865 **Luptovčiak I, Šamajová O, Schweighofer A, Meskiene I, Jonak C, Křenek P,**  
866 **Lichtscheidl I, Škultéty L, Hirt H, Šamaj J** (2014) Salt-induced subcellular kinase  
867 relocation and seedling susceptibility caused by overexpression of *Medicago* SIMKK in  
868 *Arabidopsis*. *J Exp Bot* **65**: 2335–2350
- 869 **Ovečka M, Vaškebová L, Komis G, Luptovčiak I, Smertenko A, Šamaj J** (2015)  
870 Preparation of plants for developmental and cellular imaging by lightsheet microscopy. *Nat*  
871 *Protoc* **10**: 1234–1247
- 872 **Ovečka M, von Wangenheim D, Tomančák P, Šamajová O, Komis G, Šamaj J** (2018)  
873 Multiscale imaging of plant development by light-sheet fluorescence microscopy. *Nat*  
874 *Plants* **4**: 639–650
- 875 **Ovečka M, Sojka J, Tichá M, Komis G, Basheer J, Marchetti C, Šamajová O,**  
876 **Kuběňová L, Šamaj J** (2022) Imaging plant cells and organs with light-sheet and super-  
877 resolution microscopy. *Plant Physiol* **188**: 683–702
- 878 **Pitzschke A** (2015) Modes of MAPK substrate recognition and control. *Trends Plant Sci* **20**:  
879 49–55
- 880 **Poole P, Ramachandran V, Terpolilli J** (2018) Rhizobia: from saprophytes to  
881 endosymbionts. *Nat Rev Microbiol* **16**: 291–303
- 882 **Radović J, Sokolović D, Marković J** (2009) Alfalfa-most important perennial forage legume  
883 in animal husbandry. *Biotechnol Anim Husb* **25**: 465–475
- 884 **Rae AE, Rolland V, White RG, Mathesius U** (2021) New methods for confocal imaging of  
885 infection threads in crop and model legumes. *Plant Methods* **17**: 24
- 886 **Rashid MH, Krehenbrink M, Akhtar MS** (2015) Nitrogen-Fixing Plant-Microbe  
887 Symbioses. In: *Sustainable Agriculture Reviews* (Lichtfouse, E., eds.), Springer International  
888 Publishing Switzerland **15**: 193–234
- 889 **Rasmussen MW, Roux M, Petersen M, Mundy J** (2012) MAP kinase cascades in  
890 *Arabidopsis* innate immunity. *Front Plant Sci* **3**: 169
- 891 **Roy S, Liu W, Nandety RS, Crook A, Mysore KS, Pislariu CI, Frugoli J, Dickstein R,**  
892 **Udvardi MK** (2020) Celebrating 20 years of genetic discoveries in legume nodulation and  
893 symbiotic nitrogen fixation. *Plant Cell* **32**: 15–41
- 894 **Ryu H, Laffont C, Frugier F, Hwang I** (2017) MAP Kinase-Mediated Negative Regulation  
895 of Symbiotic Nodule Formation in *Medicago truncatula*. *Mol Cells* **40**: 17–23
- 896 **Samac DA, Austin-Phillips S** (2006) Alfalfa (*Medicago sativa* L.). In: *Agrobacterium*  
897 *Protocols. Methods Mol Biol.* (Wang, K., ed.) Clifton, N. J.: Humana Press, 301–312

- 898 **Šamaj J, Ovečka M, Hlavacka A, Lecourieux F, Meskiene I, Lichtscheidl I, Lenart P,**  
899 **Salaj J, Volkmann D, Bögre L, Baluska F, Hirt H** (2003) Involvement of MAP kinase  
900 SIMK and actin cytoskeleton in the regulation of root hair tip growth. *Cell Biol Int* **27**:  
901 257–259
- 902 **Šamaj J, Ovečka M, Hlavacka A, Lecourieux F, Meskiene I, Lichtscheidl I, Lenart P,**  
903 **Salaj J, Volkmann D, Bögre L, Baluška F, Hirt H** (2002) Involvement of the mitogen-  
904 activated protein kinase SIMK in regulation of root hair tip growth. *EMBO J* **21**: 3296–2306
- 905 **Šamajová O, Plíhal O, Al-Yousif M, Hirt H, Šamaj J** (2013) Improvement of stress  
906 tolerance in plants by genetic manipulation of mitogen-activated protein kinases. *Biotechnol*  
907 *Adv* **31**: 118–128
- 908 **Shaw SL, Long SR** (2003) Nod factor inhibition of reactive oxygen efflux in a host legume.  
909 *Plant Physiol* **132**: 2196–2204
- 910 **Smékalová V, Doskočilová A, Komis G, Šamaj J** (2014) Crosstalk between secondary  
911 messengers, hormones and MAPK modules during abiotic stress signalling in plants.  
912 *Biotechnol Adv* **32**: 2–11
- 913 **Sprent JI** (2008) 60Ma of legume nodulation. What’s new? What’s changing? *J Exp Bot* **59**:  
914 1081–1084
- 915 **Sprent JI, James E** (2007) Legume evolution: Where do nodules and mycorrhizas fit in?  
916 *Plant Physiol* **144**: 575–581
- 917 **Sun T, Zhang Y** (2022) MAP kinase cascades in plant development and immune signaling.  
918 *EMBO Rep* **23**: e53817
- 919 **Terpolilli JJ, Hood GA, Poole PS** (2012) What determines the efficiency of N<sub>2</sub>-fixing  
920 *Rhizobium*-Legume Symbioses. *Adv Microb Physiol* **60**: 325–389
- 921 **Tichá M, Hlaváčková K, Hrbáčková M, Ovečka M, Šamajová O, Šamaj J** (2020) Super-  
922 resolution imaging of microtubules in *Medicago sativa*. *Methods Cell Biol* **160**: 237–251
- 923 **Timmers ACJ** (2008) The role of the plant cytoskeleton in the interaction between legumes  
924 and rhizobia. *J Microsc* **231**: 247–256
- 925 **Vyplelová P, Ovečka M, Komis G, Šamaj J** (2018) Advanced microscopy methods for  
926 bioimaging of mitotic microtubules in plants. *Methods in Cell Biology* **145**: 129–158
- 927 **Walker L, Lagunas D, Gifford ML** (2020) Determinants of Host Range Specificity in  
928 Legume-Rhizobia Symbiosis. *Front Microbiol* **11**: 585749
- 929 **Wang Q, Liu J, Zhu H** (2018) Genetic and molecular mechanisms underlying symbiotic  
930 specificity in legume-rhizobium interactions. *Front Plant Sci* **9**: 313
- 931 **White J, Prell J, James EK, Poole P** (2007) Nutrient sharing between symbionts. *Plant*  
932 *Physiol* **144**: 604–614

- 933 **Xu J, Zhang S** (2015) Mitogen-activated protein kinase cascades in signaling plant growth  
934 and development. *Trends Plant Sci* **20**: 56–64
- 935 **Yan Z, Cao J, Fan Q, Chao H, Guan X, Zhang Z, Duanmu D** (2020) Dephosphorylation  
936 of LjMPK6 by phosphatase LjPP2C is involved in regulating nodule organogenesis in *Lotus*  
937 *japonicus*. *Int J Mol Sci* **21**: 5565.
- 938 **Yang J, Lan L, Jin Y, Yu N, Wang D, Wang E** (2022) Mechanisms underlying legume-  
939 rhizobium symbioses. *J Integr Plant Biol* **64**: 244–267
- 940 **Yin J, Guan X, Zhang H, Wang L, Li H, Zhang Q, Chen T, Zeyuan X, Hong Z, Cao Y,**  
941 **Zhang Z** (2019) An MAP kinase interacts with LHK1 and regulates nodule organogenesis in  
942 *Lotus japonicus*. *Sci China Life Sci* **62**: 1203–1217
- 943 **Zhang M, Zhang S** (2022) Mitogen-activated protein kinase cascades in plant signaling. *J*  
944 *Integr Plant Biol* **64**: 301– 341

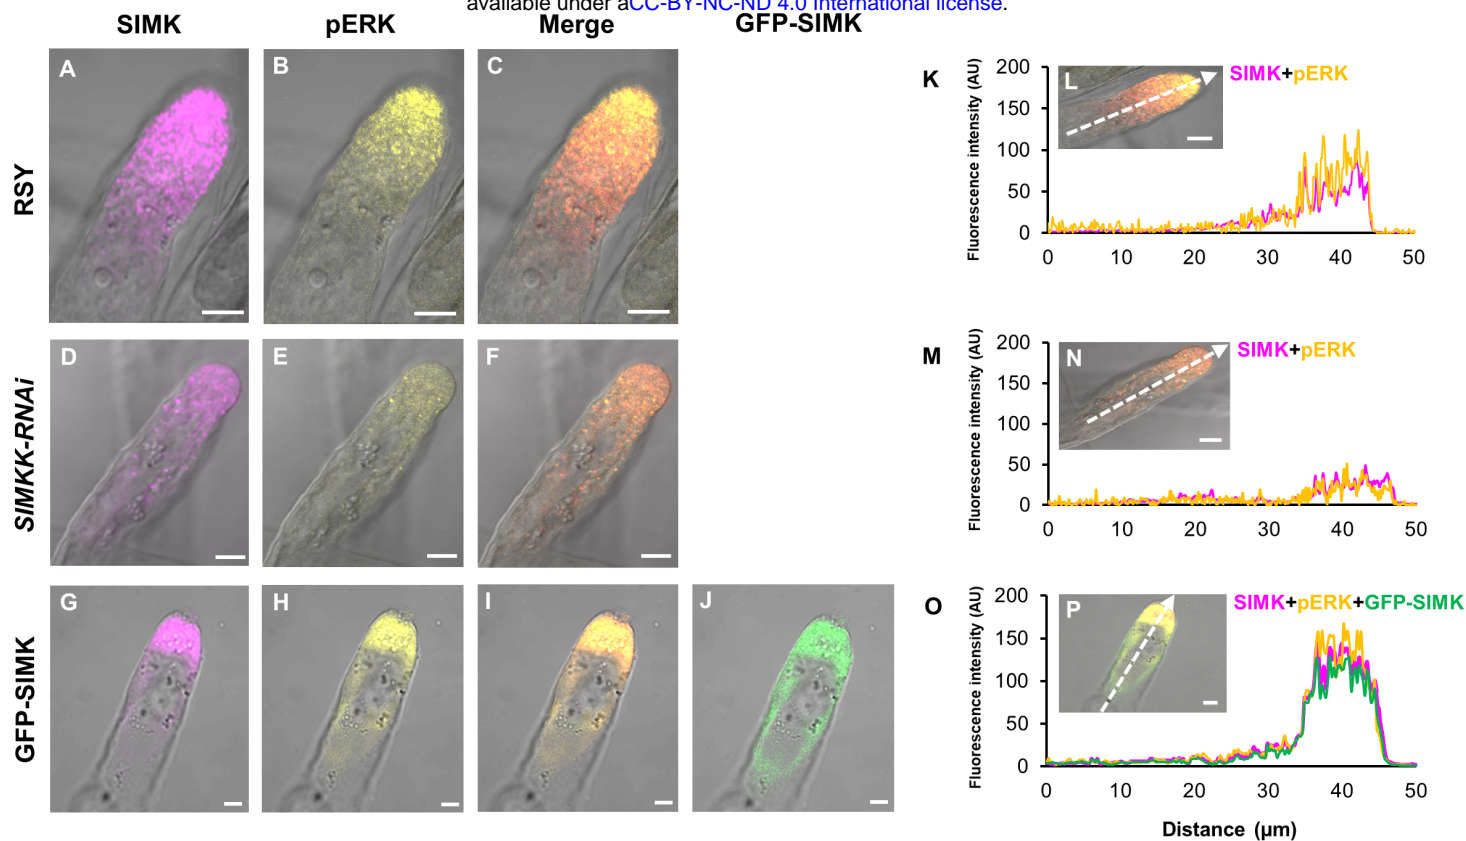

**Figure 1. Subcellular immunolocalization of SIMK and activated MAPKs in growing root hairs of alfalfa control and transgenic plants under control conditions.** (A-J) Whole-mount immunofluorescence localization of SIMK and activated MAPKs in root hairs of alfalfa RSY plants (A-C) and plants of transgenic *SIMKK-RNAi* (D-F) and GFP-SIMK (G-J) lines. SIMK (in magenta) was immunostained with SIMK-specific antibody (A,D,G) and activated MAPKs (pERK, in yellow) using phospho-specific pERK 44/42 antibody (B,E,H). Overlay of bright-field images with fluorescence channels (C,F,I), GFP-tagged SIMK (in green) was localized via GFP fluorescence in fixed root hair of transgenic GFP-SIMK line (J). (K,M,O) Fluorescence intensity profiles of SIMK, activated MAPKs, and GFP-tagged SIMK distribution along the measured line shown in (L,N,P). Scale bar = 5  $\mu\text{m}$  (A-J; L,N,P).

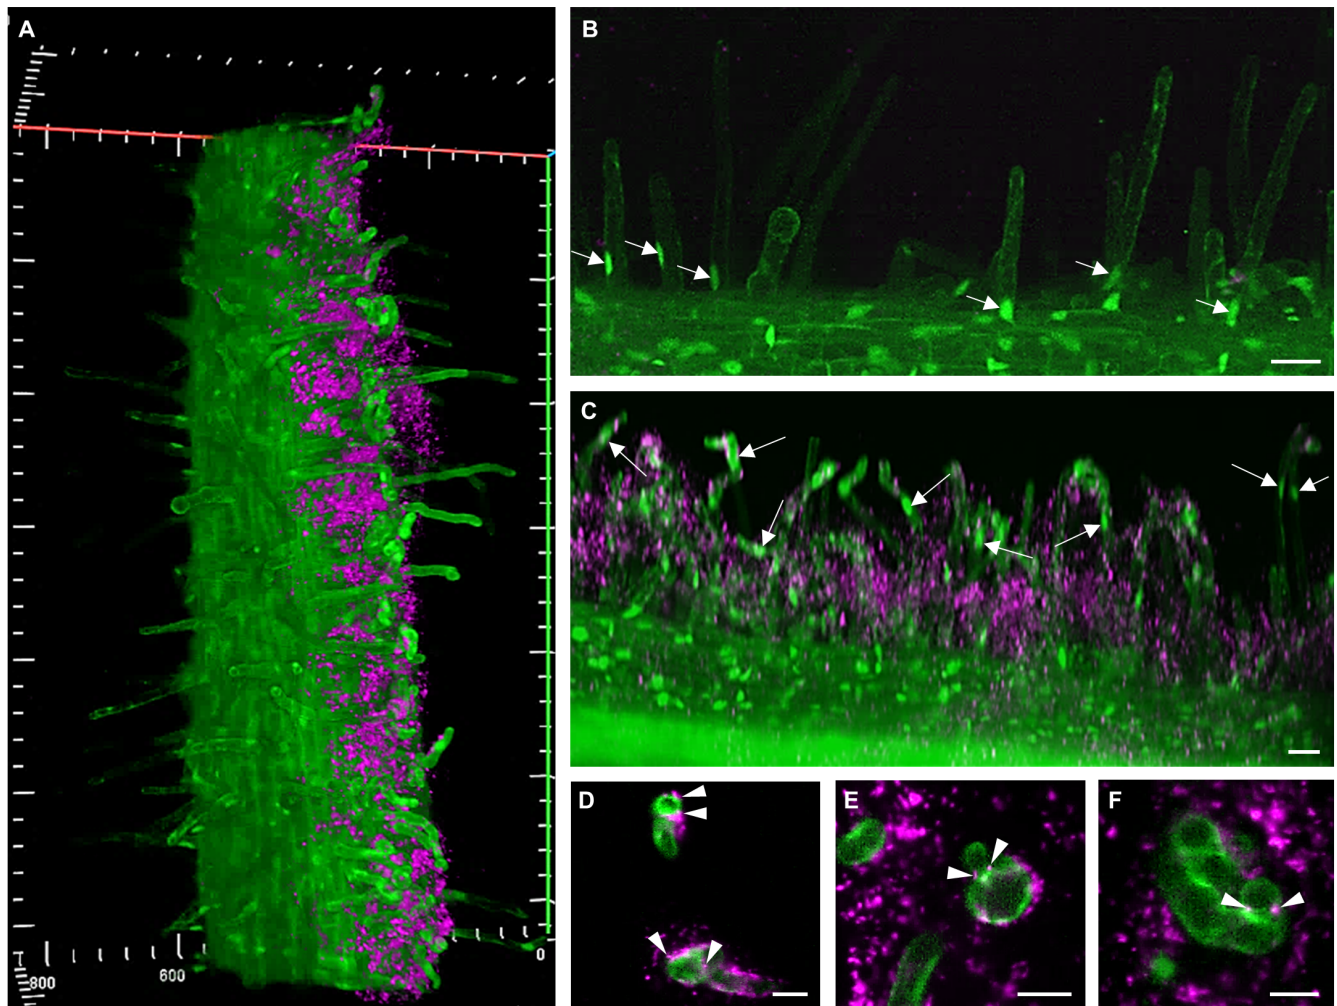

**Figure 2. Live cell imaging of early nodulation stages in roots of transgenic GFP-SIMK line at 3 dpi with mRFP-labeled *S. meliloti* using LSM.** (A) 3D rendering overview of alfalfa root stably expressing GFP-tagged SIMK (green) co-cultivated with mRFP-labeled rhizobia (magenta). Rhizobia growing on the surface of agar plates are associated with a portion of the root and root hairs that were in contact with the agar plate surface. (B) Position of nuclei in root hairs not interacting with rhizobia (arrows). (C) Position of nuclei in root hairs interacting with rhizobia (arrows). (D-F) Details of root hairs infection during rhizobia attachment and internalization (arrowheads). Scale bar = 20  $\mu\text{m}$  (D-F), 40  $\mu\text{m}$  (B-C).



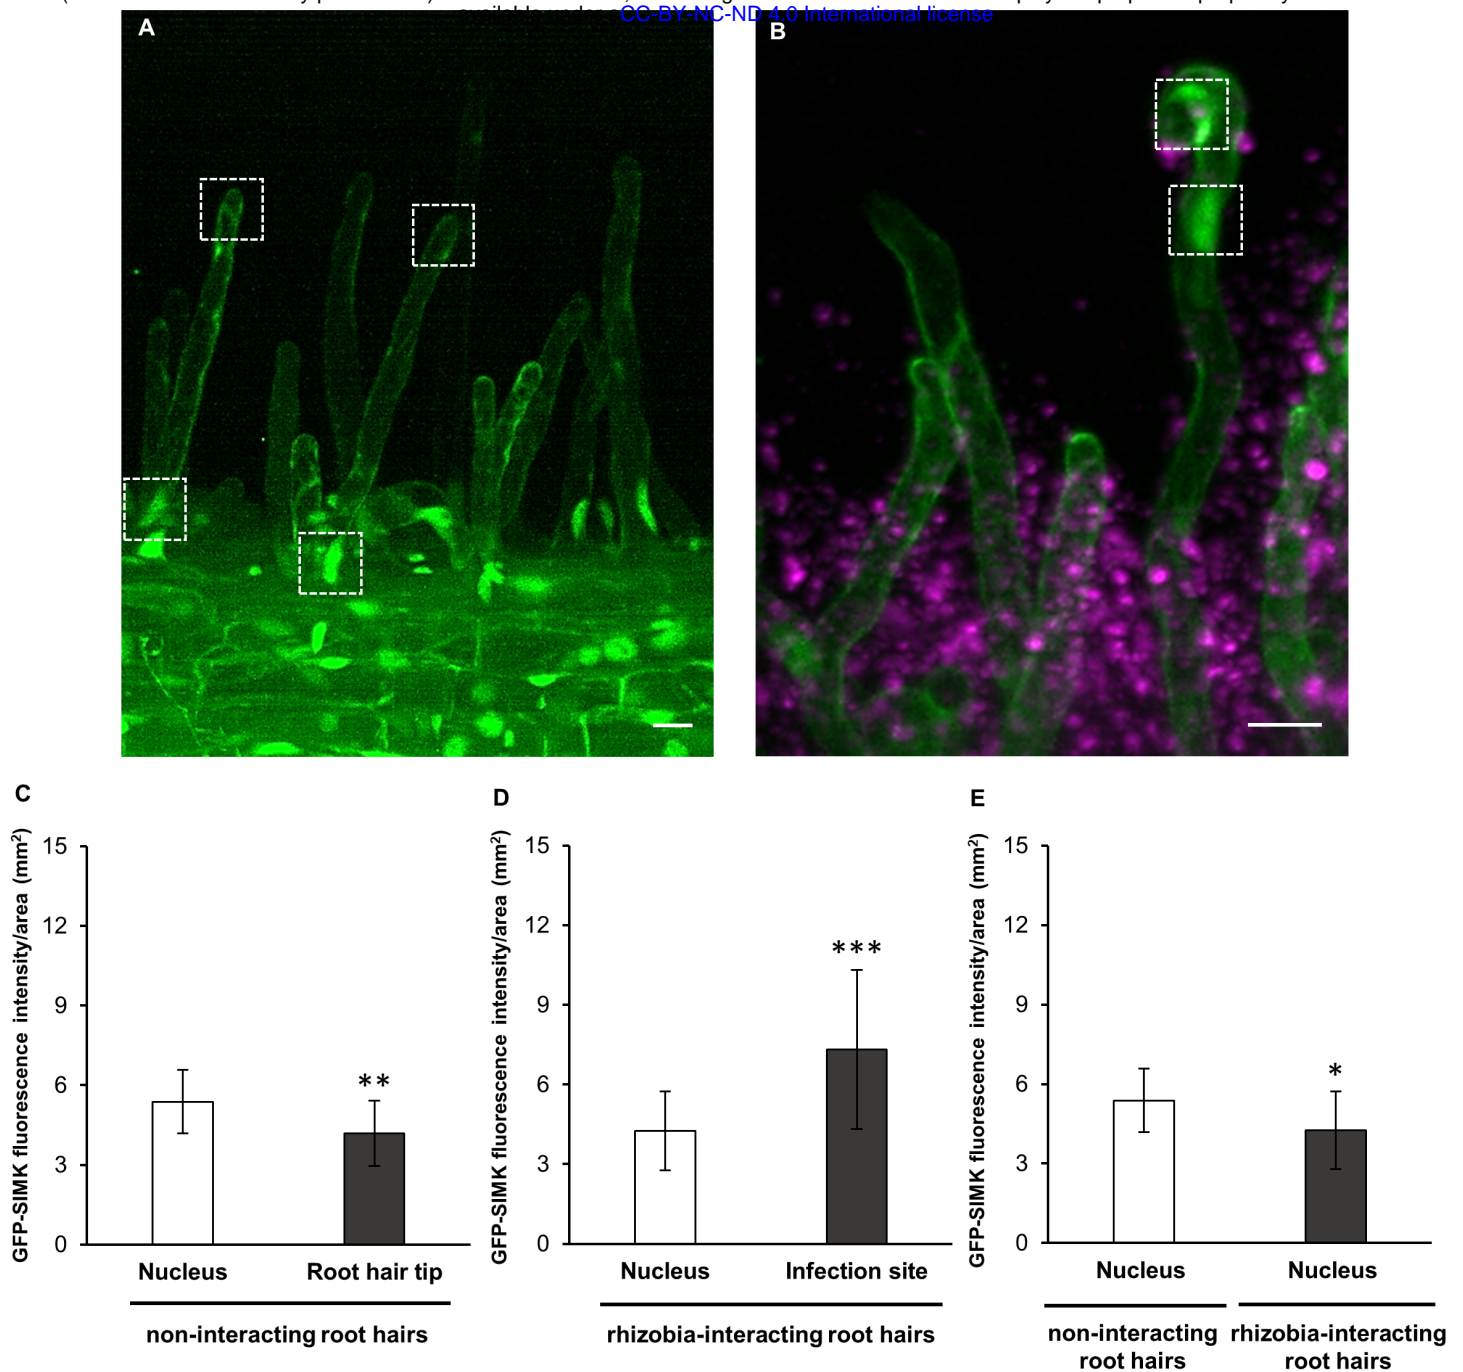

**Figure 3. Quantitative analysis of GFP-SIMK fluorescence intensity distribution in nuclei and tips of alfalfa root hairs under control conditions and upon symbiotic interaction with mRFP-labeled *S. meliloti*.** (A-B) GFP-SIMK distribution in non-interacting root hairs (A) and root hairs symbiotically interacting with rhizobia (B). Measurement of GFP-SIMK mean fluorescence intensity was performed in nuclei and root hair tips of non-interacting root hairs (A, marked by white dashed boxes) and in nuclei and infection sites of interacting root hairs (B, marked by white dashed boxes). (C-E) Quantitative evaluation of GFP-SIMK signal intensity in non-interacting root hairs (C, N=6) and in interacting root hairs (D, N=6), and comparison of GFP-SIMK signal intensity in nuclei of non-interacting and interacting root hairs (E, N=6). Statistical differences were calculated in Microsoft Excel using t-test. Error bars show  $\pm$  standard deviation (SD). Asterisks indicate statistical significance between treatments (\* $p < 0,05$ , \*\* $p < 0,01$ , \*\*\* $p < 0.001$ ). Scale bar = 20  $\mu\text{m}$  (A-B).

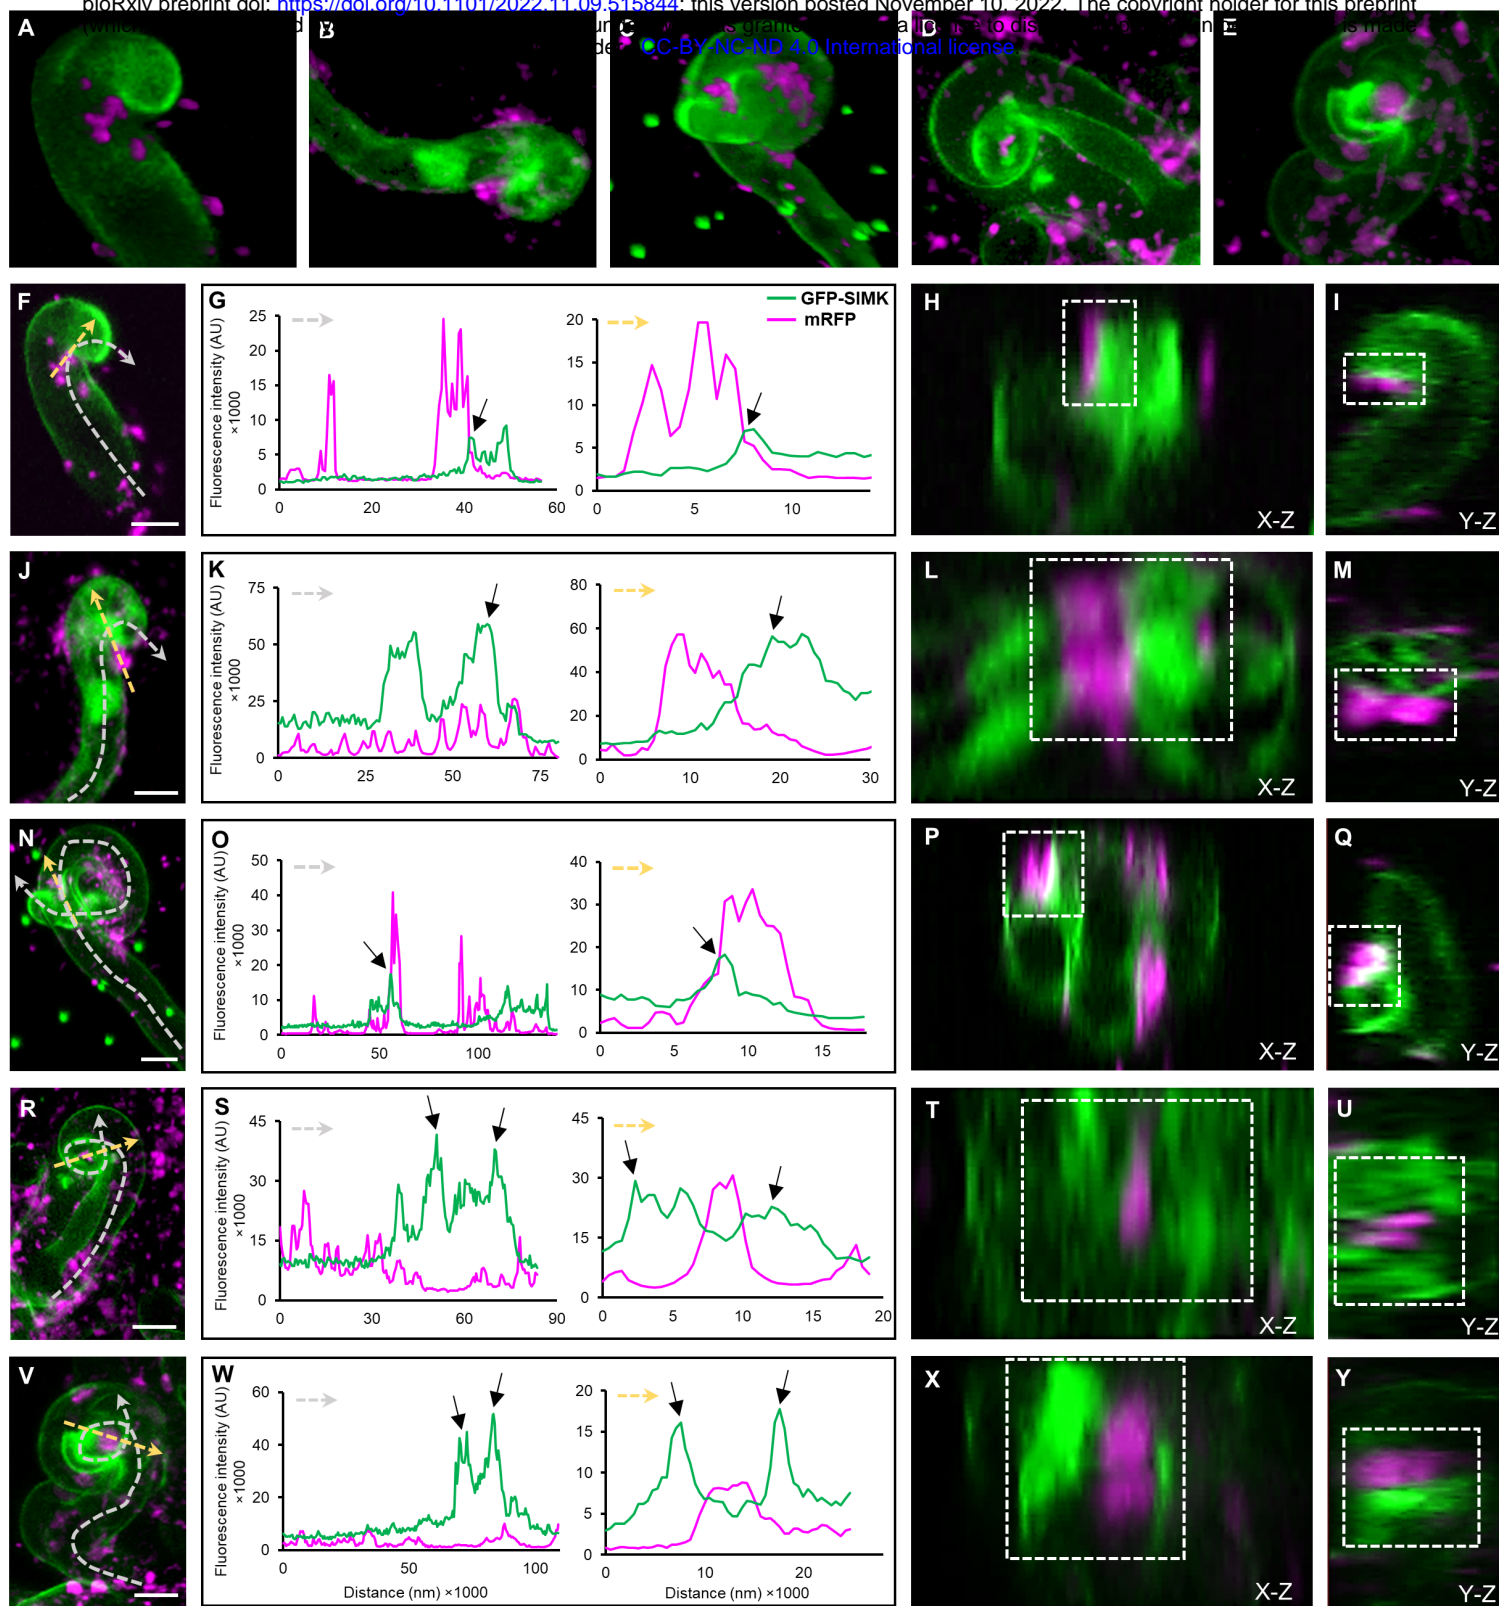

**Figure 4. Live cell localization of GFP-SIMK and its association with mRFP-labeled *S. meliloti* during early nodulation stages in root hairs 3 to 4 dpi using LSMF.** (A-E) Selected root hairs at early sequential infection stages showing the distribution of GFP-SIMK (green) and rhizobia (magenta) during attachment to the root hairs (A), followed by rhizobia internalization (B, C), infection pocket formation (D), and rhizobia enclosure inside infection pockets (E). (F-Y) Detailed qualitative and semi-quantitative analysis of GFP-SIMK (green) and rhizobia (magenta) distribution during attachment to the root hairs (F-I), rhizobia internalization (J-Q), infection pocket formation (R-U), and rhizobia enclosure inside infection pockets (V-Y). Semi-quantitative evaluation of GFP-SIMK and mRFP-labeled rhizobia fluorescence distribution (G,K,O,S,W) along dashed arrows in (F,J,N,R,V), indicating GFP-SIMK distribution in symbiotically infected root hairs (grey dashed arrows) and its association with rhizobia at specific infection sites (yellow dashed arrows). Representative images prepared from orthogonal projections in X-Z views (H,L,P,T,X) and Y-Z views (I,M,Q,U,Y) show a detailed view of GFP-SIMK accumulation around fluorescently labeled rhizobia (marked with a white dashed box). Black arrows in (G,K,O,S,W) show increased accumulation of GFP-SIMK. Green dots in (C,N) are fiducial markers. Scale bar = 10  $\mu$ m (F,J,N,R,V).

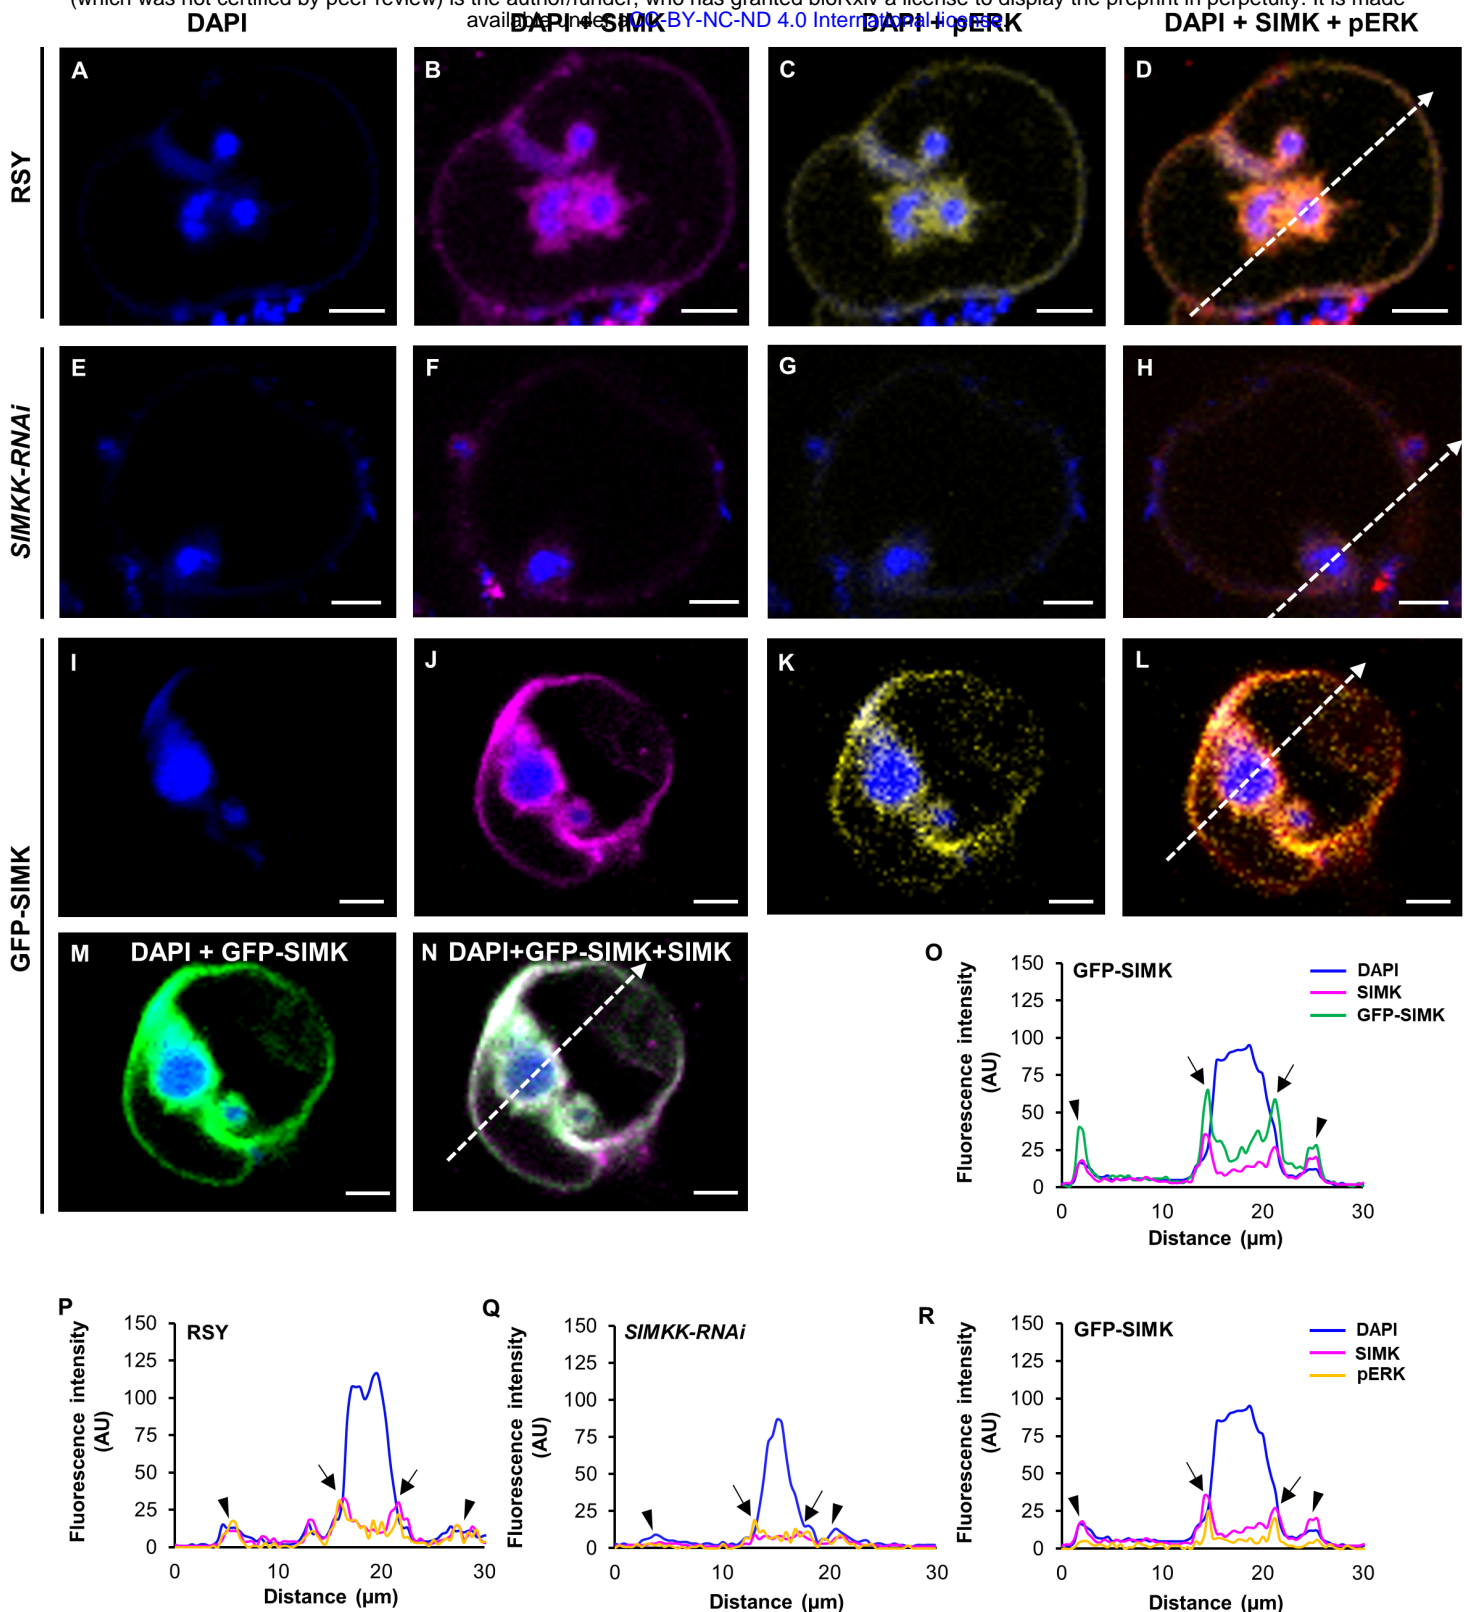

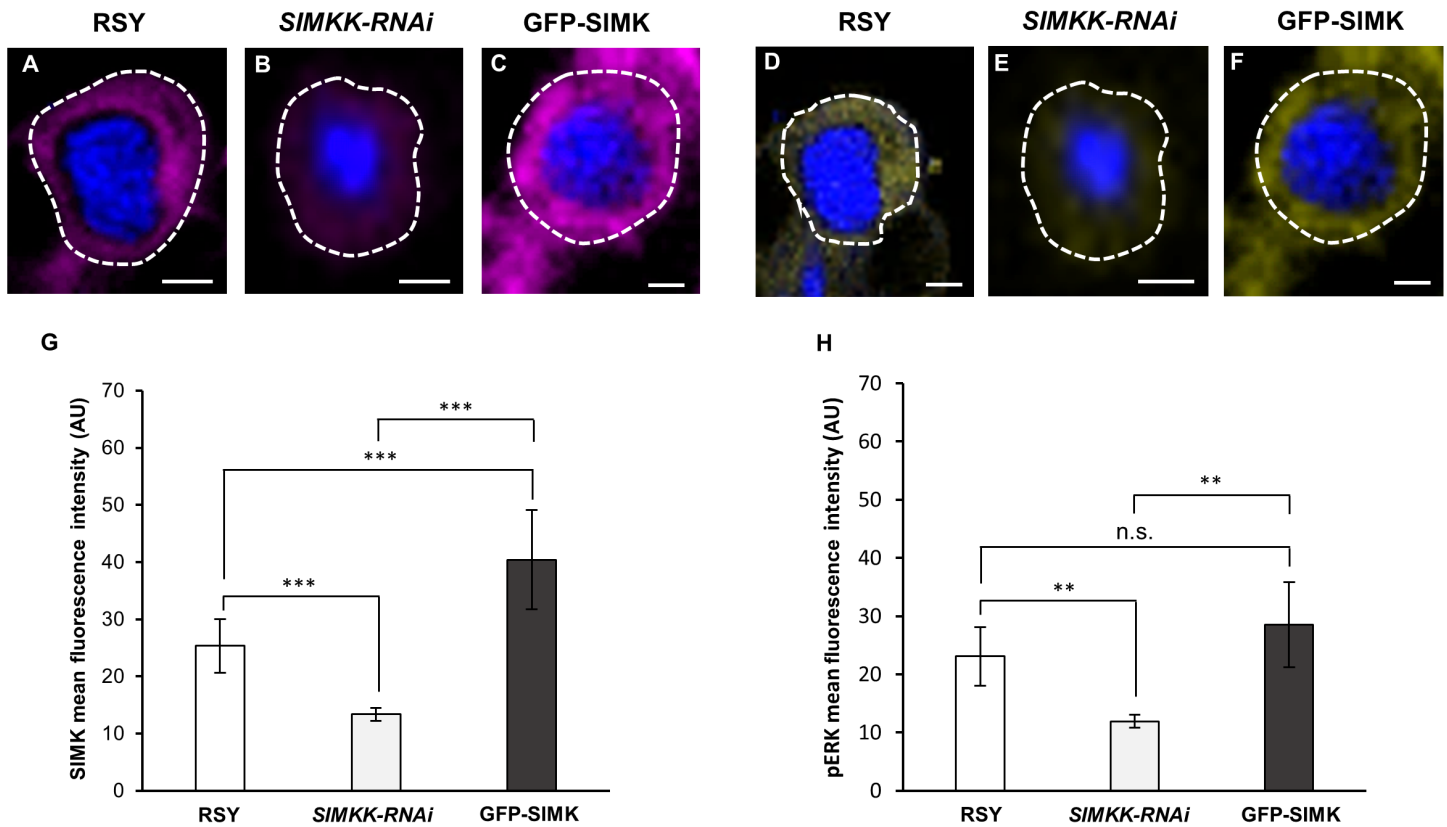

**Figure 6. Quantitative analysis of SIMK and phosphorylated MAPKs fluorescence intensity distribution around infection pockets in curled root hairs after inoculation with *S. meliloti*.** (A-F) Immunolocalization of SIMK (A-C) and phosphorylated MAPKs (D-F) in infection pockets of RSY (A,D; N=10 for SIMK, N=7 for pERK), *SIMKK-RNAi* (B,E; N=10 for SIMK, N=7 for pERK), and GFP-SIMK (C,F; N=9 for SIMK, N=7 for pERK). White dashed lines in (A-F) indicate defined ROIs in which the mean fluorescence intensity was measured. (G,H) Quantitative evaluation of SIMK (G) and activated MAPKs (H) signal intensity in transgenic *SIMKK-RNAi* and GFP-SIMK lines compared to RSY plants. Statistical differences were calculated in Microsoft Excel using t-test. Error bars show  $\pm$  standard deviation (SD). Asterisks indicate statistical significance between treatments (\*\* $p < 0,01$ , \*\*\* $p < 0.001$ , n.s. no statistical significance). Scale bar = 2  $\mu$ m (A-F).

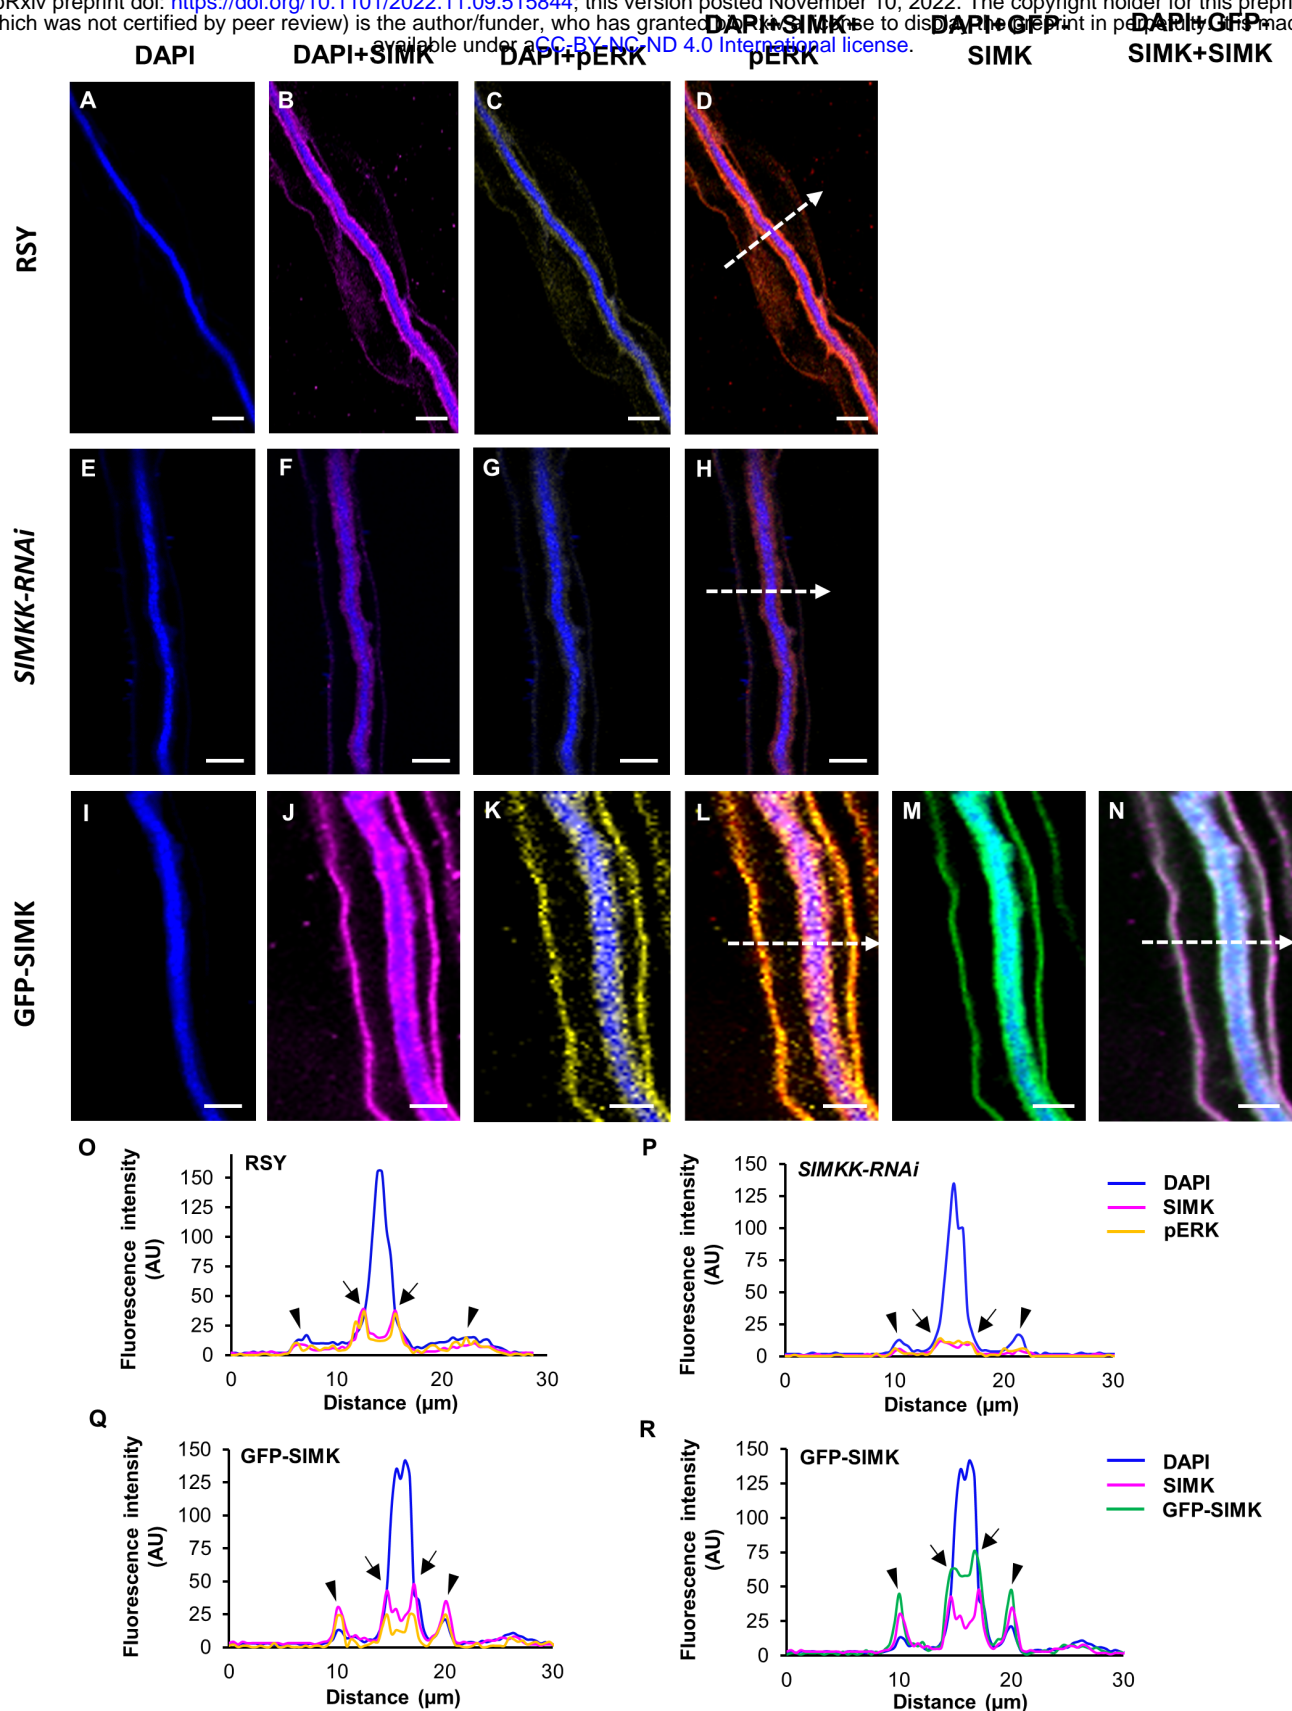

**Figure 7. Subcellular immunolocalization of SIMK and activated MAPKs around ITs in root hairs induced after inoculation with *S. meliloti*.** (A,E,I) Localization of DAPI-stained rhizobia inside ITs of RSY (A), *SIMKK-RNAi* (E), and GFP-SIMK (I) lines. (B,F,J) SIMK immunostained with SIMK-specific antibody and overlaid with DAPI in RSY (B), *SIMKK-RNAi* (F), and GFP-SIMK (J) lines. (C,G,K) Activated MAPKs immunostained with phospho-specific pERK 44/42 antibody and overlaid with DAPI in RSY (C), *SIMKK-RNAi* (G), and GFP-SIMK (K) lines. (D,H,L) Overlay of DAPI, SIMK and activated MAPKs in RSY (D), *SIMKK-RNAi* (H), and GFP-SIMK (L) plants. (M,N) GFP-tagged SIMK overlaid with DAPI (M) and overlay of GFP-tagged SIMK, SIMK immunostained with SIMK-specific antibody and DAPI in transgenic GFP-SIMK line (N). (O,P,Q,R) The fluorescence intensity distribution of SIMK, activated MAPKs, GFP-tagged SIMK, and DAPI was measured along profiles indicated by white dashed arrows in (D,H,L,N). Black arrows indicate the plasma membrane of IT, black arrowheads indicate the plasma membrane of root hair. Scale bar = 5 μm (A-N).

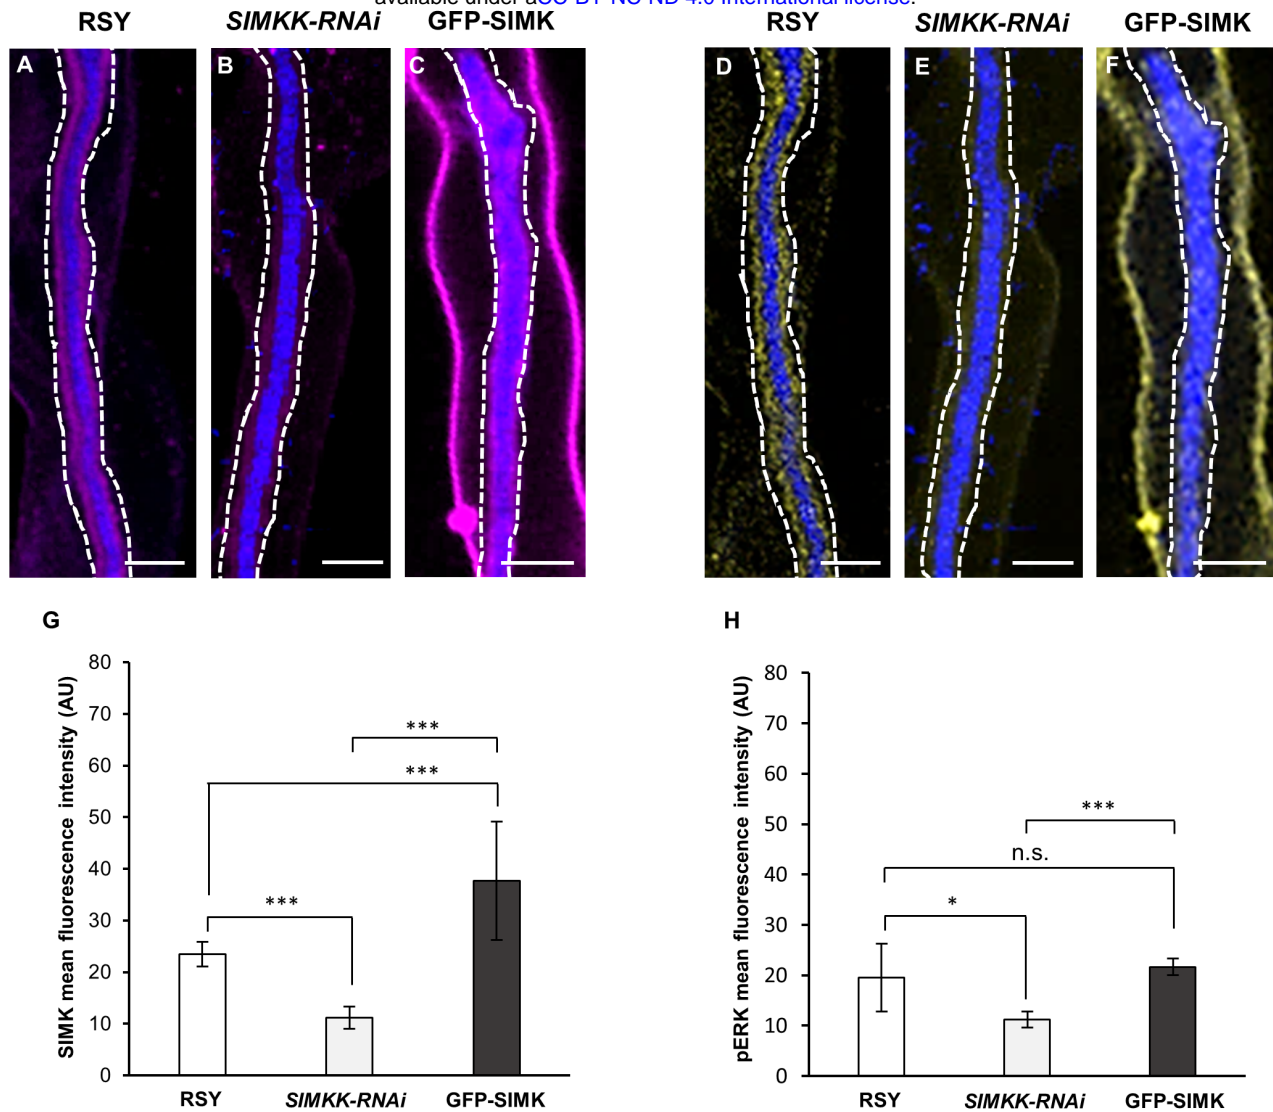

**Figure 8. Quantitative analysis of SIMK and phosphorylated MAPKs fluorescence intensity distribution around ITs in root hairs after inoculation with *S. meliloti*.** (A-F) Immunolocalization of SIMK (A-C) and phosphorylated MAPKs (D-F) in ITs of RSY (A,D; N=8 for SIMK, N=8 for pERK), *SIMKK-RNAi* (B,E; N=6 for SIMK, N=7 for pERK), and GFP-SIMK (C,F; N=8 for SIMK, N=8 for pERK). White dashed lines in (A-F) indicate defined ROIs in which the mean fluorescence intensity was measured. (G,H) Quantitative evaluation of SIMK (G) and activated MAPKs (H) signal intensity in transgenic *SIMKK-RNAi* and GFP-SIMK lines compared to RSY plants. Statistical differences were calculated in Microsoft Excel using t-test. Error bars show  $\pm$  standard deviation (SD). Asterisks indicate statistical significance between treatments (\* $p < 0,05$ , \*\*\* $p < 0.001$ , n.s. no statistical significance). Scale bar = 5  $\mu$ m (A-F).

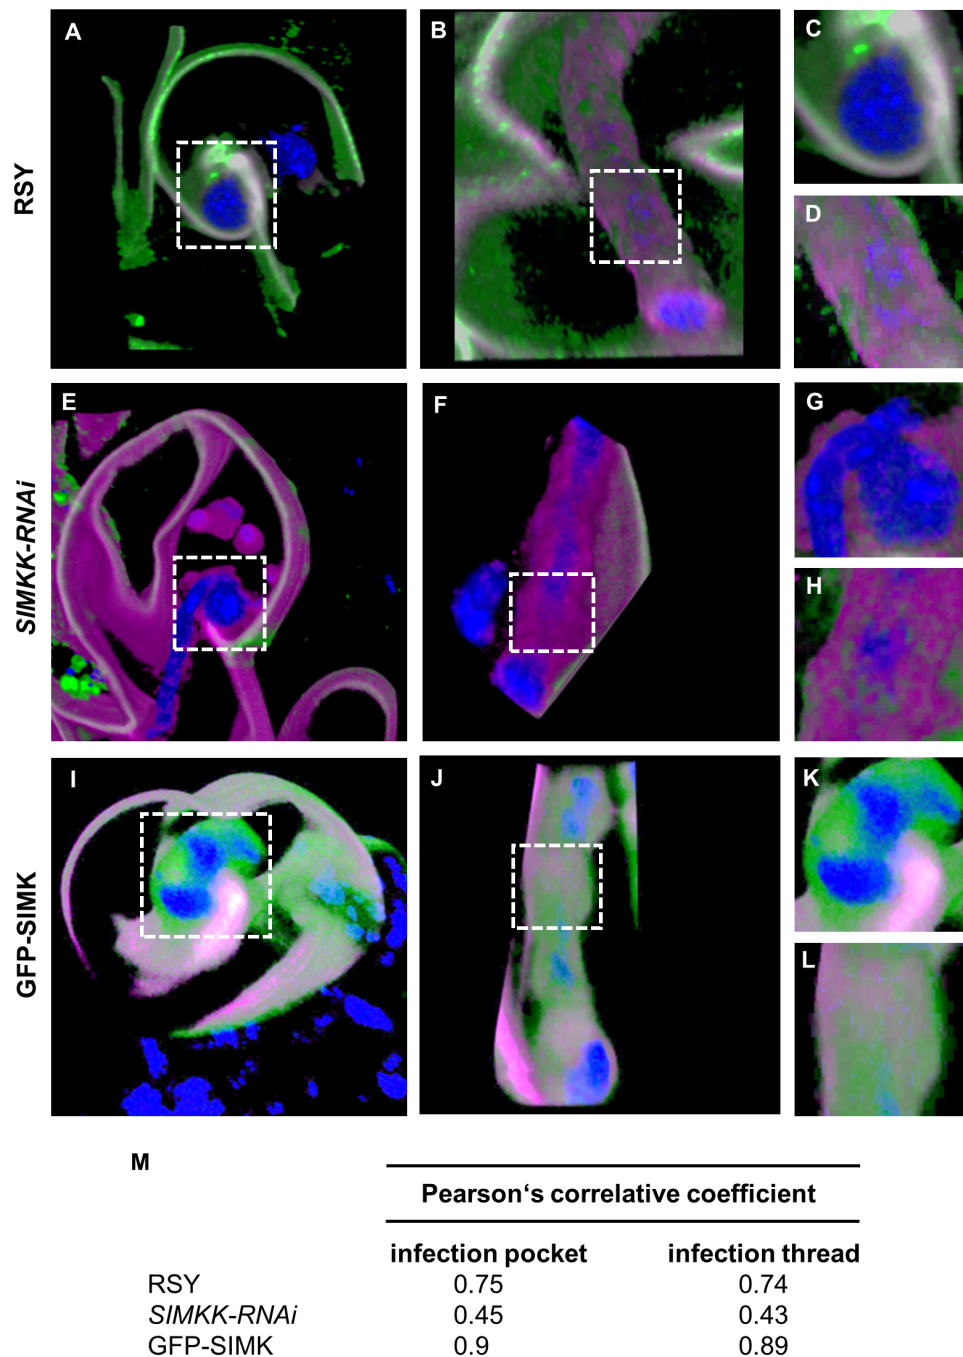

**Figure 9. Volume 3D rendering of rhizobia-containing early symbiotic structures with immunolabeled SIMK and membranes visualized using FM4-64FX in root hairs after inoculation with *S. meliloti*. (A-D) RSY root hairs. (E-H) Root hairs of *SIMKK-RNAi* line. (I-L) Root hairs of GFP-SIMK line. Subcellular localization of SIMK with membranes of infection pockets (A,C,E,G,I,K) and ITs (B,D,F,H,J,L). Overlay of membranes (in magenta), SIMK (in green) and DAPI-stained rhizobia (in blue). (M) Averaged Pearson's correlative coefficients of colocalization analysis between SIMK and FM4-64FX-stained membranes around infection pockets and ITs. Details of infection pockets and ITs shown in (C, D, G, H, K, L) are marked with a white dashed boxes in (A,B,E,F,I,J).**

## Parsed Citations

- Bekešová S, Komis G, Křenek P, Vypelová P, Ovečka M, Luptovčíak I, Šamaj J (2015) Monitoring protein phosphorylation by acrylamide pendant Phos-Tag<sup>TM</sup> in various plants. *Front Plant Sci* 6: 336**  
Google Scholar: [Author Only](#) [Title Only](#) [Author and Title](#)
- Bisseling T, Geurts R (2020) Specificity in legume nodule symbiosis. *Science* 369: 620(621**  
Google Scholar: [Author Only](#) [Title Only](#) [Author and Title](#)
- Brewin NJ (2004) Plant cell wall remodeling in the rhizobium-legume symbiosis. *Crit Rev Plant Sci* 23: 293–316**  
Google Scholar: [Author Only](#) [Title Only](#) [Author and Title](#)
- Brundrett MC (2002) Coevolution of roots and mycorrhizas of land plants. *New Phytol* 154: 275–304**  
Google Scholar: [Author Only](#) [Title Only](#) [Author and Title](#)
- Cardinale F, Jonak C, Ligterink W, Niehaus K, Boller T, Hirt H (2000) Differential activation of four specific MAPK pathways by distinct elicitors. *J Biol Chem* 275: 36734–36740**  
Google Scholar: [Author Only](#) [Title Only](#) [Author and Title](#)
- Cardinale F, Meskiene I, Ouaked F, Hirt H (2002) Convergence and divergence of stress-induced mitogen-activated protein kinase signaling pathways at the level of two distinct mitogen-activated protein kinase kinases. *Plant Cell* 14: 703–711**  
Google Scholar: [Author Only](#) [Title Only](#) [Author and Title](#)
- Checucci A, Azzarello E, Bazzicalupo M, Galardini M, Lagomarsino A, Mancuso S, Marti L, Marzano MC, Mocali S, Squartini A, Zanardo M, Mengoni A (2016) Mixed Nodule Infection in Sinorhizobium meliloti-Medicago sativa Symbiosis Suggest the Presence of Cheating Behavior. *Front Plant Sci* 7: 835**  
Google Scholar: [Author Only](#) [Title Only](#) [Author and Title](#)
- Chen T, Zhou B, Duan L, Zhu H, Zhang Z (2017) MtMAPKK4 is an essential gene for growth and reproduction of Medicago truncatula. *Physiol Plant* 159: 492–503**  
Google Scholar: [Author Only](#) [Title Only](#) [Author and Title](#)
- Chen T, Zhu H, Ke D, Cai K, Wang C, Gou H, Hong Z, Zhang Z (2012) A MAP kinase kinase interacts with SymRK and regulates nodule organogenesis in Lotus japonicus. *Plant Cell* 24: 823–838**  
Google Scholar: [Author Only](#) [Title Only](#) [Author and Title](#)
- Clúa J, Roda C, Zanetti ME, Blanco FA (2018) Compatibility between Legumes and Rhizobia for the Establishment of a Successful Nitrogen-Fixing Symbiosis. *Genes (Basel)* 9: 125**  
Google Scholar: [Author Only](#) [Title Only](#) [Author and Title](#)
- Costes SV, Daelemans D, Cho EH, Dobbin Z, Pavlakis G, Lockett S (2004) Automatic and quantitative measurement of protein-protein colocalization in live cells. *Biophys J* 86: 3993–4003**  
Google Scholar: [Author Only](#) [Title Only](#) [Author and Title](#)
- Dénarié J, Cullimore J (1993) Lipo-oligosaccharide nodulation factors: A new class of signaling molecules mediating recognition and morphogenesis. *Cell* 74: 951(954**  
Google Scholar: [Author Only](#) [Title Only](#) [Author and Title](#)
- Fåhres G (1957) The infection of clover root hairs by nodule bacteria studied by a simple glass slide technique. *J Gen Microbiol* 16: 374–381**  
Google Scholar: [Author Only](#) [Title Only](#) [Author and Title](#)
- Fournier J, Teillet A, Chabaud M, Ivanov S, Genre A, Limpens E, de Carvalho-Niebel F, Barker DG (2015) Remodelling of the infection chamber before infection thread formation reveals a two-step mechanism for rhizobial entry into the host legume root hair. *Plant Physiol* 167: 1233(1242**  
Google Scholar: [Author Only](#) [Title Only](#) [Author and Title](#)
- Fournier J, Timmers AC, Sieberer BJ, Jauneau A, Chabaud M, Barker DG (2008) Mechanism of infection thread elongation in root hairs of Medicago truncatula and dynamic interplay with associated rhizobial colonization. *Plant Physiol* 148: 1985–1995**  
Google Scholar: [Author Only](#) [Title Only](#) [Author and Title](#)
- Gage DJ (2004) Infection and Invasion of Roots by Symbiotic, Nitrogen-Fixing Rhizobia during Nodulation of Temperate Legumes. *Microbiol Mol Biol Rev* 68: 280(300**  
Google Scholar: [Author Only](#) [Title Only](#) [Author and Title](#)
- Grimsrud PA, den Os D, Wenger CD, Swaney DL, Schwartz D, Sussman MR, Ané JM, Coon JJ (2010) Large-scale phosphoprotein analysis in Medicago truncatula roots provides insight into in vivo kinase activity in legumes. *Plant Physiol* 152: 19–28**  
Google Scholar: [Author Only](#) [Title Only](#) [Author and Title](#)
- Hrbáčková M, Luptovčíak I, Hlaváčková K, Dvořák P, Tichá M, Šamajová O, Novák D, Bednarz H, Niehaus K, Ovečka M, Šamaj J**



**(2021) Overexpression of alfalfa SIMK promotes root hair growth, nodule clustering and shoot biomass production. Plant Biotechnol J 19: 767(784)**

Google Scholar: [Author Only](#) [Title Only](#) [Author and Title](#)

**Ibáñez F, Wall L, Fabra A (2017) Starting points in plant-bacteria nitrogen-fixing symbioses: intercellular invasion of the roots. J Exp Bot 68: 1905–1918**

Google Scholar: [Author Only](#) [Title Only](#) [Author and Title](#)

**Jones KM, Kobayashi H, Davies BW, Taga, ME, Walker, GC (2007) How rhizobial symbionts invade plants: the Sinorhizobium - Medicago model. Nat Rev Microbiol 5: 619(633)**

Google Scholar: [Author Only](#) [Title Only](#) [Author and Title](#)

**Kidaj D, Krysa M, Susniak K, Matys J, Komaniecka I, Sroka-Bartnicka A (2020) Biological activity of Nod factors. Acta Biochim Pol 67: 435(440)**

Google Scholar: [Author Only](#) [Title Only](#) [Author and Title](#)

**Kiegerl S, Cardinale F, Siligan C, Gross A, Baudouin E, Liwosz A (2000) SIMKK, a mitogen-activated protein kinase (MAPK) kinase, is a specific activator of the salt stress-induced MAPK, SIMK. Plant Cell 12: 2247–2258**

Google Scholar: [Author Only](#) [Title Only](#) [Author and Title](#)

**Komis G, Šamajová O, Ovečka M, Šamaj J (2018) Cell and Developmental Biology of Plant Mitogen-Activated Protein Kinases. Annu Rev Plant Biol 69: 237(265)**

Google Scholar: [Author Only](#) [Title Only](#) [Author and Title](#)

**Lopez-Gomez M, Sandal N, Stougaard J, Boller T (2012) Interplay of fig22-induced defence responses and nodulation in Lotus japonicus. J Exp Bot 63: 393–401**

Google Scholar: [Author Only](#) [Title Only](#) [Author and Title](#)

**Munnik T, Ligterink W, Meskiene I, Calderini O, Beyerly J, Musgrave A, Hirt H (1999) Distinct osmo-sensing protein kinase pathways are involved in signalling moderate and severe hyper-osmotic stress. Plant J 20: 381–388**

Google Scholar: [Author Only](#) [Title Only](#) [Author and Title](#)

**Oldroyd GED (2013) Speak, friend, and enter: signalling systems that promote beneficial symbiotic associations in plants. Nat Rev Microbiol 11: 252(263)**

Google Scholar: [Author Only](#) [Title Only](#) [Author and Title](#)

**Oldroyd GED, Downie JA (2008) Coordinating nodule morphogenesis with rhizobial infection in legumes. Annu Rev Plant Biol 59: 519–46**

Google Scholar: [Author Only](#) [Title Only](#) [Author and Title](#)

**Oldroyd GED, Murray JD, Poole PS, Downie JA (2011) The Rules of Engagement in the Legume-Rhizobial Symbiosis. Annu Rev Genet 45: 119(144)**

Google Scholar: [Author Only](#) [Title Only](#) [Author and Title](#)

**Ovečka M, Takáč T, Komis G, Vadovič P, Bekešová S, Doskočilová A, Smékalová V, Luptovčíak I, Šamajová O, Schweighofer A, Meskiene I, Jonak C, Křenek P, Lichtscheidl I, Škultéty L, Hirt H, Šamaj J (2014) Salt-induced subcellular kinase relocation and seedling susceptibility caused by overexpression of Medicago SIMKK in Arabidopsis. J Exp Bot 65: 2335–2350**

Google Scholar: [Author Only](#) [Title Only](#) [Author and Title](#)

**Ovečka M, Vaškebová L, Komis G, Luptovčíak I, Smertenko A, Šamaj J (2015) Preparation of plants for developmental and cellular imaging by lightsheet microscopy. Nat Protoc 10: 1234–1247**

Google Scholar: [Author Only](#) [Title Only](#) [Author and Title](#)

**Ovečka M, von Wangenheim D, Tomančák P, Šamajová O, Komis G, Šamaj J (2018) Multiscale imaging of plant development by light-sheet fluorescence microscopy. Nat Plants 4: 639(650)**

Google Scholar: [Author Only](#) [Title Only](#) [Author and Title](#)

**Ovečka M, Sojka J, Tichá M, Komis G, Basheer J, Marchetti C, Šamajová O, Kuběňová L, Šamaj J (2022) Imaging plant cells and organs with light-sheet and super-resolution microscopy. Plant Physiol 188: 683(702)**

Google Scholar: [Author Only](#) [Title Only](#) [Author and Title](#)

**Pitzschke A (2015) Modes of MAPK substrate recognition and control. Trends Plant Sci 20: 49(55)**

Google Scholar: [Author Only](#) [Title Only](#) [Author and Title](#)

**Poole P, Ramachandran V, Terpolilli J (2018) Rhizobia: from saprophytes to endosymbionts. Nat Rev Microbiol 16: 291(303)**

Google Scholar: [Author Only](#) [Title Only](#) [Author and Title](#)

**Radović J, Sokolović D, Marković J (2009) Alfalfa-most important perennial forage legume in animal husbandry. Biotechnol Anim Husb 25: 465–475**

Google Scholar: [Author Only](#) [Title Only](#) [Author and Title](#)

Rae AE, Rolland V, White RG, Mathesius U (2021) New methods for confocal imaging of infection threads in crop and model legumes. *Plant Methods* 17: 24

Google Scholar: [Author Only](#) [Title Only](#) [Author and Title](#)

Rashid MH, Krehenbrink M, Akhtar MS (2015) Nitrogen-Fixing Plant-Microbe Symbioses. In: *Sustainable Agriculture Reviews* (Lichtfouse, E., eds.), Springer International Publishing Switzerland 15: 193(234)

Google Scholar: [Author Only](#) [Title Only](#) [Author and Title](#)

Rasmussen MW, Roux M, Petersen M, Mundy J (2012) MAP kinase cascades in Arabidopsis innate immunity. *Front Plant Sci* 3: 169

Google Scholar: [Author Only](#) [Title Only](#) [Author and Title](#)

Roy S, Liu W, Nandety RS, Crook A, Mysore KS, Pislariu CI, Frugoli J, Dickstein R, Udvardi MK (2020) Celebrating 20 years of genetic discoveries in legume nodulation and symbiotic nitrogen fixation. *Plant Cell* 32: 15(41)

Google Scholar: [Author Only](#) [Title Only](#) [Author and Title](#)

Ryu H, Laffont C, Frugier F, Hwang I (2017) MAP Kinase-Mediated Negative Regulation of Symbiotic Nodule Formation in *Medicago truncatula*. *Mol Cells* 40: 17(23)

Google Scholar: [Author Only](#) [Title Only](#) [Author and Title](#)

Samac DA, Austin-Phillips S (2006) Alfalfa (*Medicago sativa* L.). In: *Agrobacterium Protocols*. Methods Mol Biol. (Wang, K., ed.) Clifton, N. J.: Humana Press, 301–312

Google Scholar: [Author Only](#) [Title Only](#) [Author and Title](#)

Šamaj J, Ovečka M, Hlavacka A, Lecourieux F, Meskiene I, Lichtscheidl I, Lenart P, Salaj J, Volkmann D, Bögre L, Baluska F, Hirt H (2003) Involvement of MAP kinase SIMK and actin cytoskeleton in the regulation of root hair tip growth. *Cell Biol Int* 27: 257(259)

Google Scholar: [Author Only](#) [Title Only](#) [Author and Title](#)

Šamaj J, Ovečka M, Hlavacka A, Lecourieux F, Meskiene I, Lichtscheidl I, Lenart P, Salaj J, Volkmann D, Bögre L, Baluška F, Hirt H (2002) Involvement of the mitogen-activated protein kinase SIMK in regulation of root hair tip growth. *EMBO J* 21: 3296(2306)

Google Scholar: [Author Only](#) [Title Only](#) [Author and Title](#)

Šamajová O, Plíhal O, Al-Yousif M, Hirt H, Šamaj J (2013) Improvement of stress tolerance in plants by genetic manipulation of mitogen-activated protein kinases. *Biotechnol Adv* 31: 118–128

Google Scholar: [Author Only](#) [Title Only](#) [Author and Title](#)

Shaw SL, Long SR (2003) Nod factor inhibition of reactive oxygen efflux in a host legume. *Plant Physiol* 132: 2196–2204

Google Scholar: [Author Only](#) [Title Only](#) [Author and Title](#)

Smékalová V, Doskočilová A, Komis G, Šamaj J (2014) Crosstalk between secondary messengers, hormones and MAPK modules during abiotic stress signalling in plants. *Biotechnol Adv* 32: 2(11)

Google Scholar: [Author Only](#) [Title Only](#) [Author and Title](#)

Sprent JI (2008) 60Ma of legume nodulation. What's new? What's changing? *J Exp Bot* 59: 1081–1084

Google Scholar: [Author Only](#) [Title Only](#) [Author and Title](#)

**Sprent JI, James E (2007) Legume evolution: Where do nodules and mycorrhizas fit in? *Plant Physiol* 144: 575–581**

Sun T, Zhang Y (2022) MAP kinase cascades in plant development and immune signaling. *EMBO Rep* 23: e53817

Google Scholar: [Author Only](#) [Title Only](#) [Author and Title](#)

Terpolilli JJ, Hood GA, Poole PS (2012) What determines the efficiency of N<sub>2</sub>-fixing Rhizobium-Legume Symbioses. *Adv Microb Physiol* 60: 325–389

Google Scholar: [Author Only](#) [Title Only](#) [Author and Title](#)

Tichá M, Hlaváčková K, Hrbáčková M, Ovečka M, Šamajová O, Šamaj J (2020) Super-resolution imaging of microtubules in *Medicago sativa*. *Methods Cell Biol* 160: 237(251)

Google Scholar: [Author Only](#) [Title Only](#) [Author and Title](#)

Timmers ACJ (2008) The role of the plant cytoskeleton in the interaction between legumes and rhizobia. *J Microsc* 231: 247(256)

Google Scholar: [Author Only](#) [Title Only](#) [Author and Title](#)

Vyplelová P, Ovečka M, Komis G, Šamaj J (2018) Advanced microscopy methods for bioimaging of mitotic microtubules in plants. *Methods in Cell Biology* 145: 129(158)

Google Scholar: [Author Only](#) [Title Only](#) [Author and Title](#)

Walker L, Lagunas D, Gifford ML (2020) Determinants of Host Range Specificity in Legume-Rhizobia Symbiosis. *Front Microbiol* 11: 585749

Google Scholar: [Author Only](#) [Title Only](#) [Author and Title](#)

Wang Q, Liu J, Zhu H (2018) Genetic and molecular mechanisms underlying symbiotic specificity in legume-rhizobium interactions. *Front Plant Sci* 9: 313

Google Scholar: [Author Only](#) [Title Only](#) [Author and Title](#)

**White J, Prell J, James EK, Poole P (2007) Nutrient sharing between symbionts. *Plant Physiol* 144: 604–614**

Google Scholar: [Author Only](#) [Title Only](#) [Author and Title](#)

**Xu J, Zhang S (2015) Mitogen-activated protein kinase cascades in signaling plant growth and development. *Trends Plant Sci* 20: 56(64**

Google Scholar: [Author Only](#) [Title Only](#) [Author and Title](#)

**Yan Z, Cao J, Fan Q, Chao H, Guan X, Zhang Z, Duanmu D (2020) Dephosphorylation of LjMPK6 by phosphatase LjPP2C is involved in regulating nodule organogenesis in *Lotus japonicus*. *Int J Mol Sci* 21: 5565.**

Google Scholar: [Author Only](#) [Title Only](#) [Author and Title](#)

**Yang J, Lan L, Jin Y, Yu N, Wang D, Wang E (2022) Mechanisms underlying legume-rhizobium symbioses. *J Integr Plant Biol* 64: 244(267**

Google Scholar: [Author Only](#) [Title Only](#) [Author and Title](#)

**Yin J, Guan X, Zhang H, Wang L, Li H, Zhang Q, Chen T, Zeyuan X, Hong Z, Cao Y, Zhang Z (2019) An MAP kinase interacts with LHK1 and regulates nodule organogenesis in *Lotus japonicus*. *Sci China Life Sci* 62: 1203–1217**

Google Scholar: [Author Only](#) [Title Only](#) [Author and Title](#)

**Zhang M, Zhang S (2022) Mitogen-activated protein kinase cascades in plant signaling. *J Integr Plant Biol* 64: 301– 341**

Google Scholar: [Author Only](#) [Title Only](#) [Author and Title](#)
